# Supplementary material for: Pyrrole-based anion-responsive π-electronic molecules as fluorescence sensors responsive to multiple stimuli
Source: Royal Society of Chemistry journal article supplement (doi:10.1039/d0ob00952k), 2020-01-01
Supplement: d0ob00952k1.pdf [file d0ob00952k1.pdf]

## Electronic Supplementary Information

### Pyrrole-based anion-responsive $\pi$ -electronic molecules as fluorescence sensors responsive to multiple stimuli

Shinya Sugiura and Hiromitsu Maeda\*

*Department of Applied Chemistry, College of Life Sciences, Ritsumeikan University, Kusatsu 525–8577, Japan, Fax: +81 77 561 2659; Tel: +81 77 561 5969; E-mail: maedahir@ph.ritsumei.ac.jp*

#### Table of Contents

|                                                                                                                             |     |
|-----------------------------------------------------------------------------------------------------------------------------|-----|
| <b>1. Spectroscopic data</b>                                                                                                | S2  |
| <b>Fig. S1,2</b> $^1\text{H}$ and $^{13}\text{C}$ NMR spectra.                                                              | S2  |
| <b>Fig. S3,4</b> UV/vis absorption and fluorescence spectra.                                                                | S4  |
| <b>2. X-ray crystallographic data</b>                                                                                       | S5  |
| <b>Fig. S5,6</b> Ortep and packing drawings of single-crystal X-ray structure.                                              | S5  |
| <b>3. Theoretical study</b>                                                                                                 | S7  |
| <b>Fig. S7,8</b> Optimized structures.                                                                                      | S7  |
| <b>Fig. S9,10</b> Molecular orbitals.                                                                                       | S8  |
| <b>Fig. S11–14</b> TD-DFT calculations.                                                                                     | S9  |
| Cartesian coordination of optimized structures                                                                              | S11 |
| <b>4. Anion-binding and protonation behaviors</b>                                                                           | S18 |
| <b>Fig. S15–20</b> $^1\text{H}$ NMR spectral changes upon the addition of $\text{Cl}^-$ or TFA.                             | S18 |
| <b>Fig. S21–28</b> UV/vis absorption spectral changes and corresponding titration plots upon the addition of anions or TFA. | S22 |
| <b>Fig. S29–36</b> Fluorescence spectral changes upon the addition of $\text{Cl}^-$ or TFA.                                 | S26 |
| <b>Fig. S37</b> $^1\text{H}$ NMR spectral changes upon the addition of $\text{Cl}^-$ and TFA.                               | S29 |
| <b>Fig. S38–45</b> UV/vis absorption and fluorescence spectral changes upon the addition of $\text{Cl}^-$ and TFA.          | S29 |

# 1. Synthetic procedures and spectroscopic data

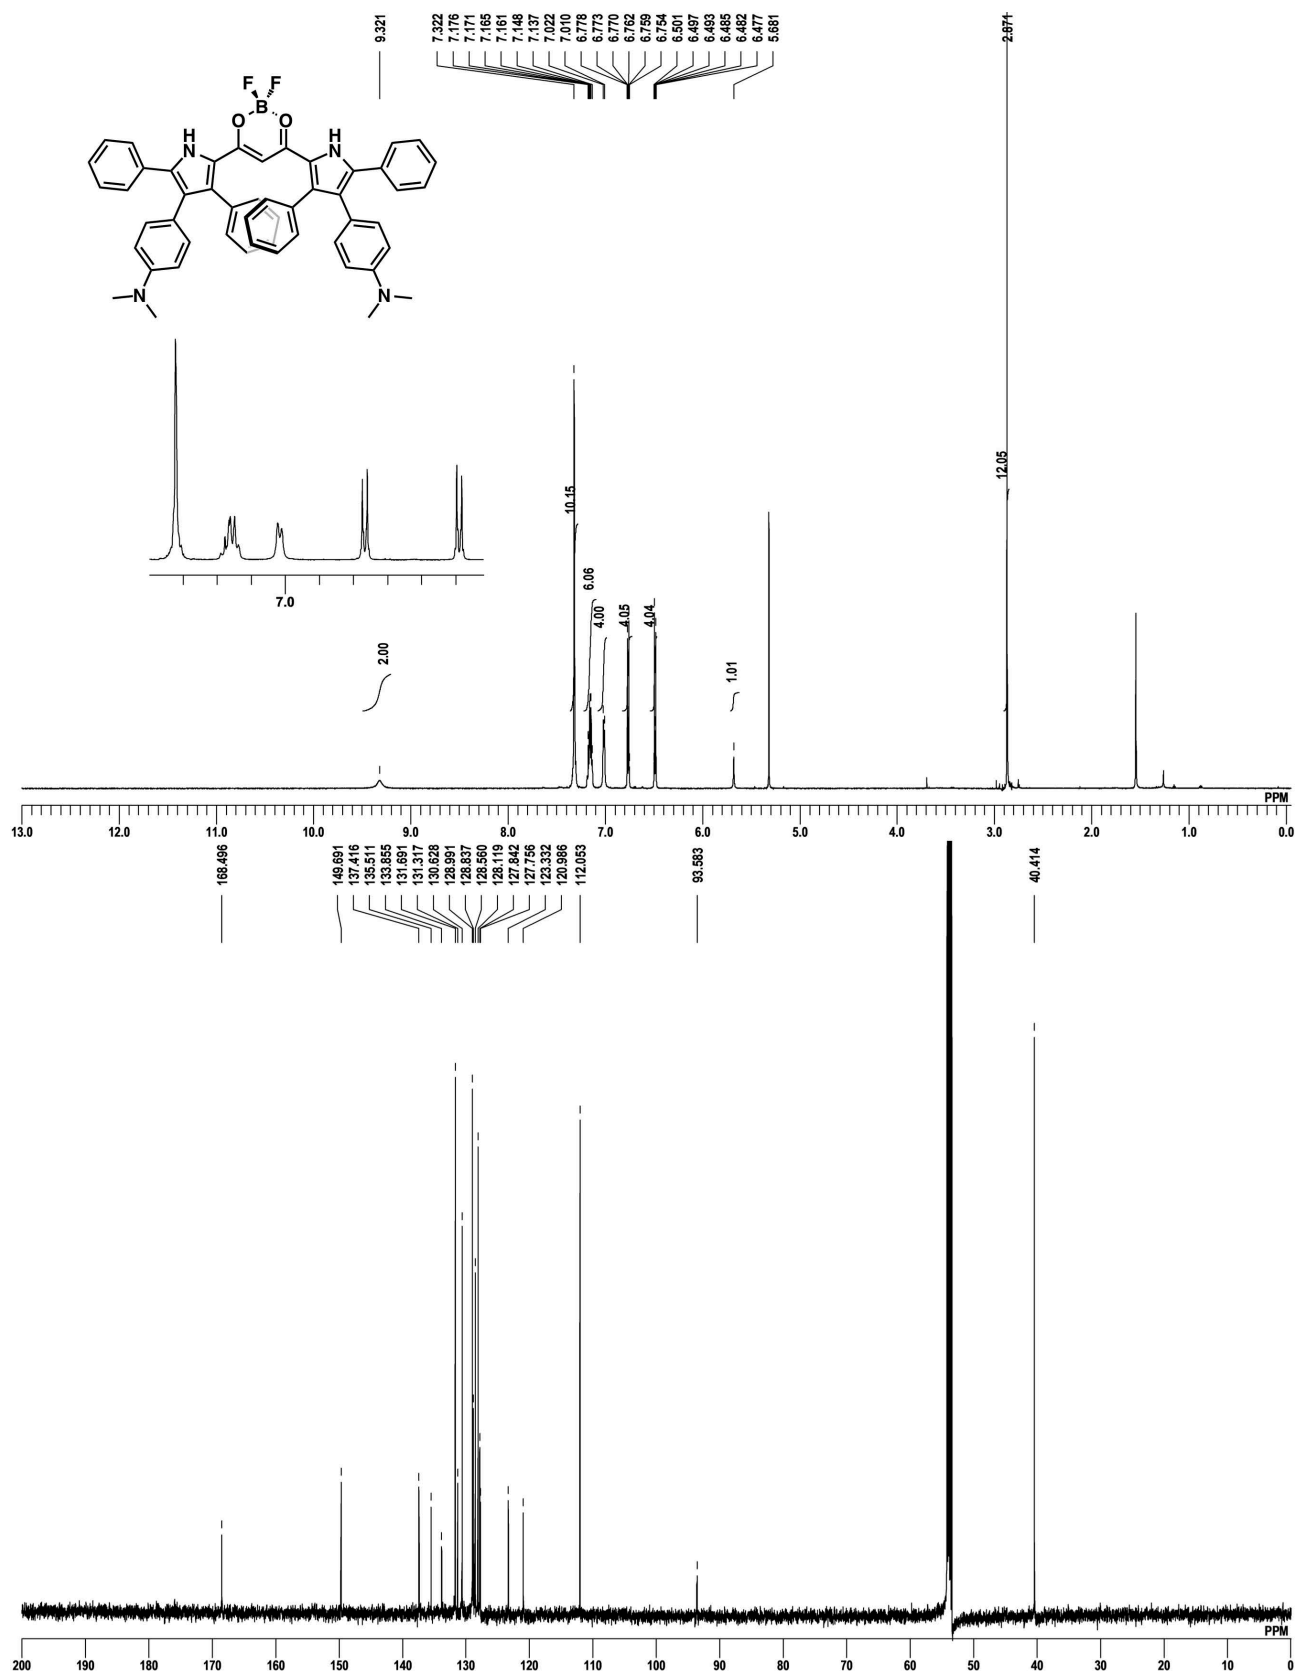

**Fig. S1**  $^1\text{H}$  NMR (top) and  $^{13}\text{C}$  NMR (bottom) spectra of **3a** in  $\text{CD}_2\text{Cl}_2$  at  $20^\circ\text{C}$ . The detailed data are described in the experimental section.

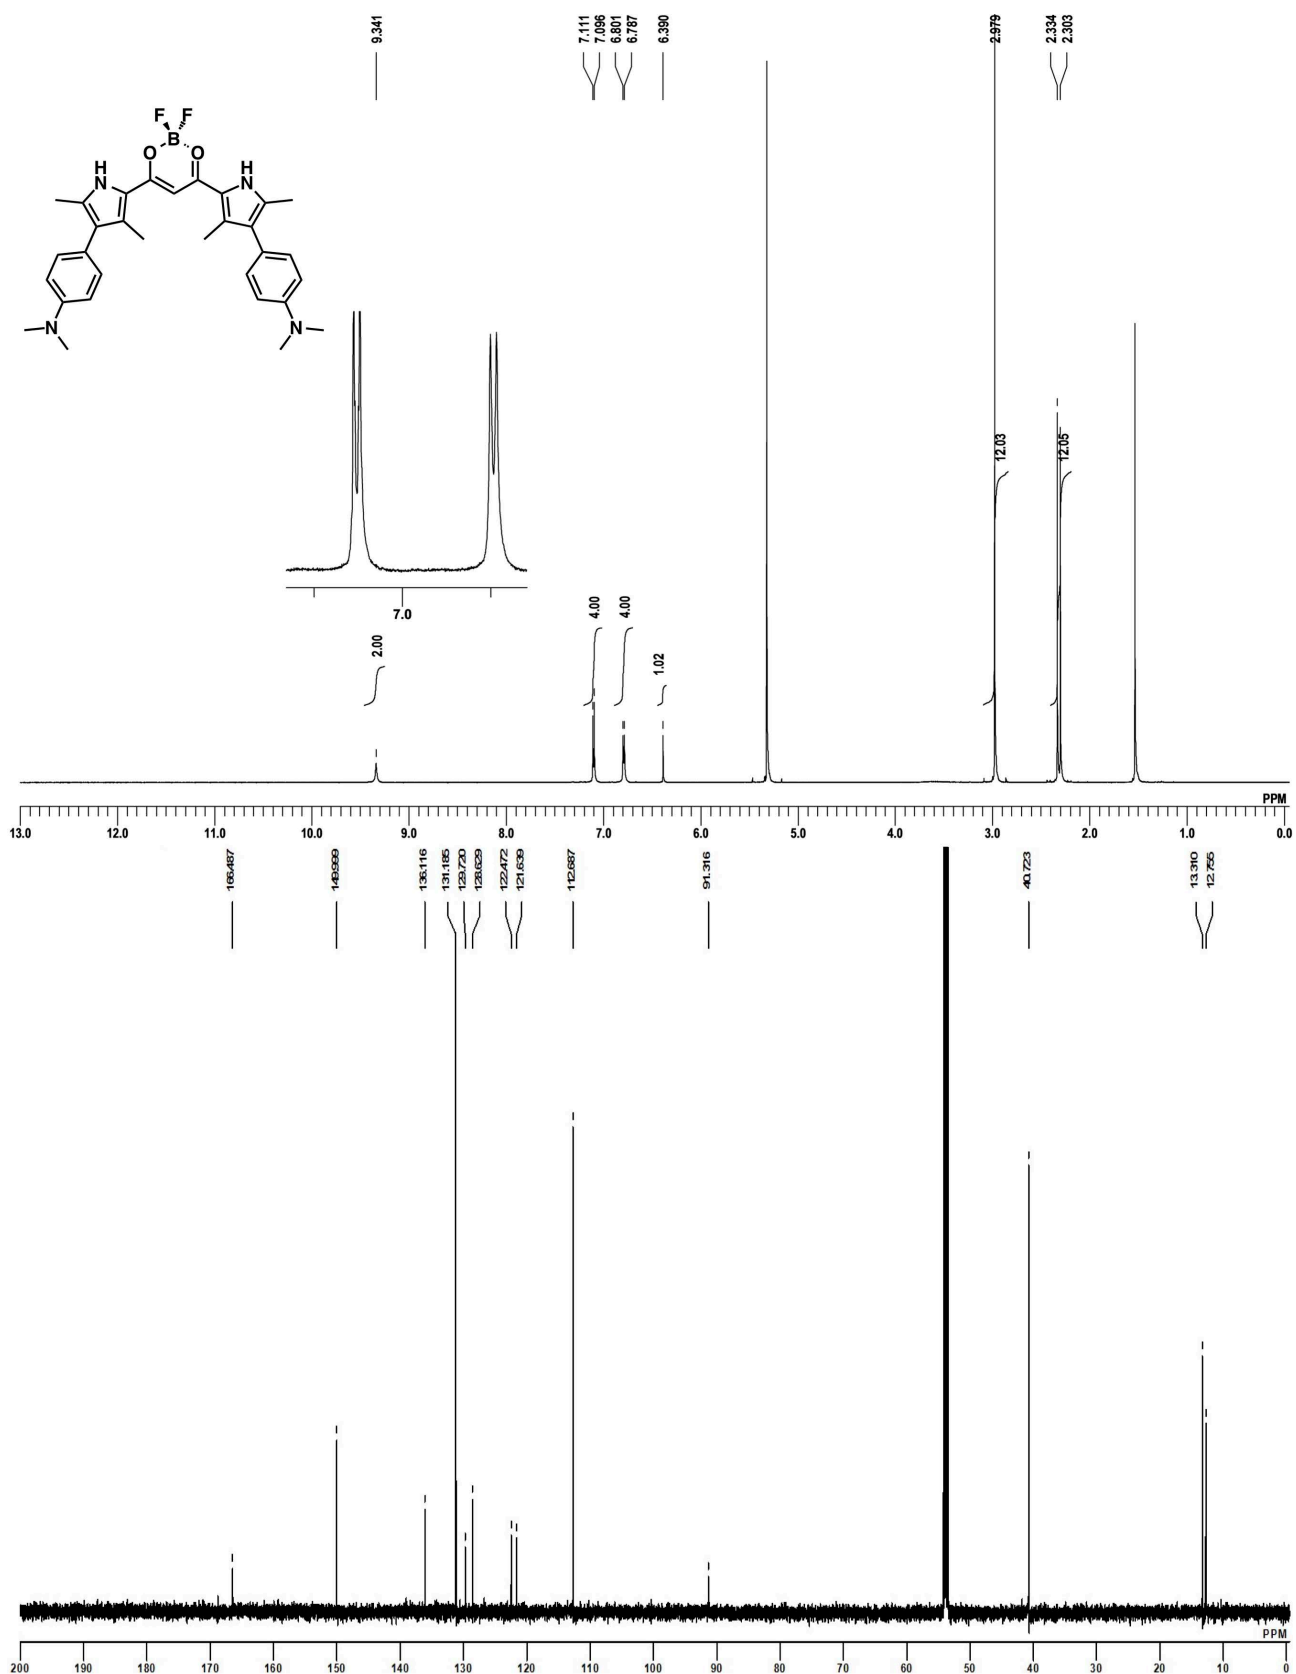

**Fig. S2** <sup>1</sup>H NMR (top) and <sup>13</sup>C NMR (bottom) spectra of **3b** in CD<sub>2</sub>Cl<sub>2</sub> at 20 °C. The detailed data are described in the experimental section.

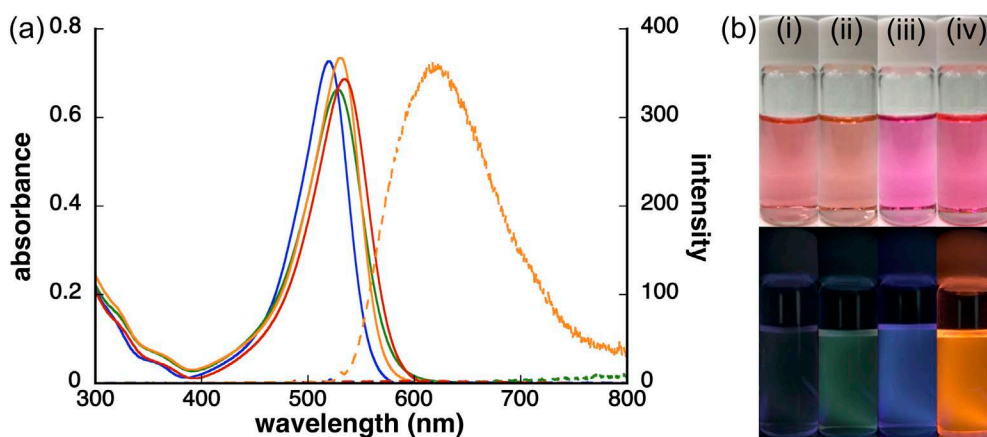

**Fig. S3** (a) UV/vis absorption (solid line) and fluorescence spectra (broken line) of **3a** ( $1.0 \times 10^{-5}$  M), excited at the absorption maxima, in CH<sub>2</sub>Cl<sub>2</sub> (dielectric constant  $\epsilon_r$ : 8.93; green,  $\lambda_{\max}$  = 528 nm), THF ( $\epsilon_r$ : 7.58; blue,  $\lambda_{\max}$  = 520 nm), CHCl<sub>3</sub> ( $\epsilon_r$ : 4.81; red,  $\lambda_{\max}$  = 535 nm), and toluene ( $\epsilon_r$ : 2.38; orange,  $\lambda_{\max}$  = 531 nm,  $\lambda_{\text{em}}$  = 630 nm) and (b) the corresponding photographs under visible light (top) and 365-nm UV light (bottom) in (i) CH<sub>2</sub>Cl<sub>2</sub>, (ii) THF, (iii) CHCl<sub>3</sub>, and (iv) toluene under the conditions for spectral measurements. Fluorescence quantum yields ( $\Phi_{\text{FL}}$ ) are estimated as 0.001 (CH<sub>2</sub>Cl<sub>2</sub>), 0.000 (THF), 0.017 (CHCl<sub>3</sub>), and 0.29 (toluene).

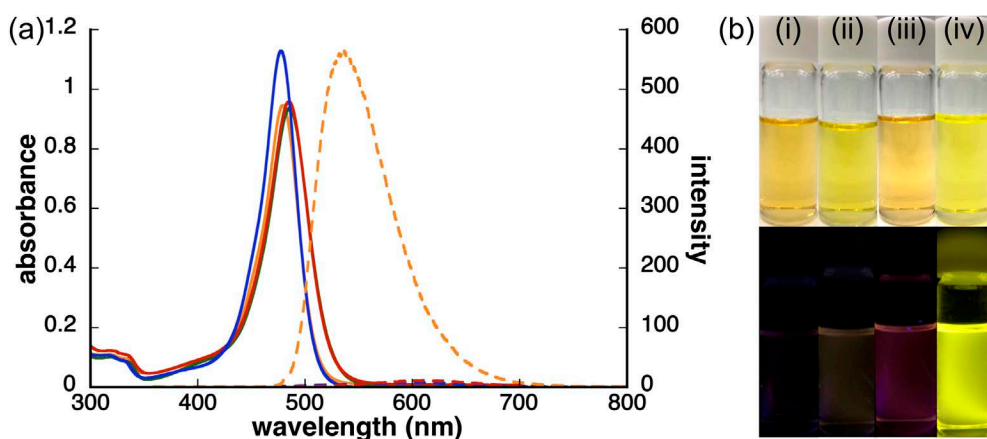

**Fig. S4** (a) UV/vis absorption (solid line) and fluorescence spectra (broken line) of **3b** ( $1.0 \times 10^{-5}$  M), excited at the absorption maxima, in CH<sub>2</sub>Cl<sub>2</sub> ( $\epsilon_r$ : 8.93; green,  $\lambda_{\max}$  = 485 nm), THF ( $\epsilon_r$ : 7.58; blue,  $\lambda_{\max}$  = 478 nm), CHCl<sub>3</sub> ( $\epsilon_r$ : 4.81; red,  $\lambda_{\max}$  = 485 nm), and toluene ( $\epsilon_r$ : 2.38; orange,  $\lambda_{\max}$  = 480 nm,  $\lambda_{\text{em}}$  = 535 nm) and (b) the corresponding photographs under visible light (top) and 365-nm UV light (bottom) in (i) CH<sub>2</sub>Cl<sub>2</sub>, (ii) THF, (iii) CHCl<sub>3</sub>, and (iv) toluene under the conditions for spectral measurements.  $\Phi_{\text{FL}}$  are estimated as 0.013 (CH<sub>2</sub>Cl<sub>2</sub>), 0.034 (THF), 0.047 (CHCl<sub>3</sub>), and 0.47 (toluene).

## 2. X-ray crystallographic data

Table S1 Crystallographic details.

| 3a                                                           |                                                                                                                              |
|--------------------------------------------------------------|------------------------------------------------------------------------------------------------------------------------------|
| formula                                                      | C <sub>51</sub> H <sub>43</sub> BF <sub>2</sub> N <sub>4</sub> O <sub>2</sub> ·2C <sub>4</sub> H <sub>8</sub> O <sub>2</sub> |
| fw                                                           | 968.91                                                                                                                       |
| crystal size, mm                                             | 1.000 × 0.050 × 0.050                                                                                                        |
| crystal system                                               | monoclinic                                                                                                                   |
| space group                                                  | C2/c (no. 15)                                                                                                                |
| <i>a</i> , Å                                                 | 27.487(2)                                                                                                                    |
| <i>b</i> , Å                                                 | 11.9733(10)                                                                                                                  |
| <i>c</i> , Å                                                 | 19.9835(17)                                                                                                                  |
| $\alpha$ , °                                                 | 90                                                                                                                           |
| $\beta$ , °                                                  | 132.480(9)                                                                                                                   |
| $\gamma$ , °                                                 | 90                                                                                                                           |
| <i>V</i> , Å <sup>3</sup>                                    | 4850.4(9)                                                                                                                    |
| $\rho_{\text{calcd}}$ , gcm <sup>-3</sup>                    | 1.639                                                                                                                        |
| <i>Z</i>                                                     | 4                                                                                                                            |
| <i>T</i> , K                                                 | 100(2)                                                                                                                       |
| $\mu$ , mm <sup>-1</sup>                                     | 0.038                                                                                                                        |
| no. of reflns                                                | 71568                                                                                                                        |
| no. of unique reflns                                         | 5577                                                                                                                         |
| variables                                                    | 330                                                                                                                          |
| $\lambda$ , Å                                                | 0.4115                                                                                                                       |
| <i>R</i> <sub>1</sub> ( <i>I</i> > 2 $\sigma$ ( <i>I</i> ))  | 0.0385                                                                                                                       |
| <i>wR</i> <sub>2</sub> ( <i>I</i> > 2 $\sigma$ ( <i>I</i> )) | 0.1017                                                                                                                       |
| <i>GOF</i>                                                   | 1.053                                                                                                                        |

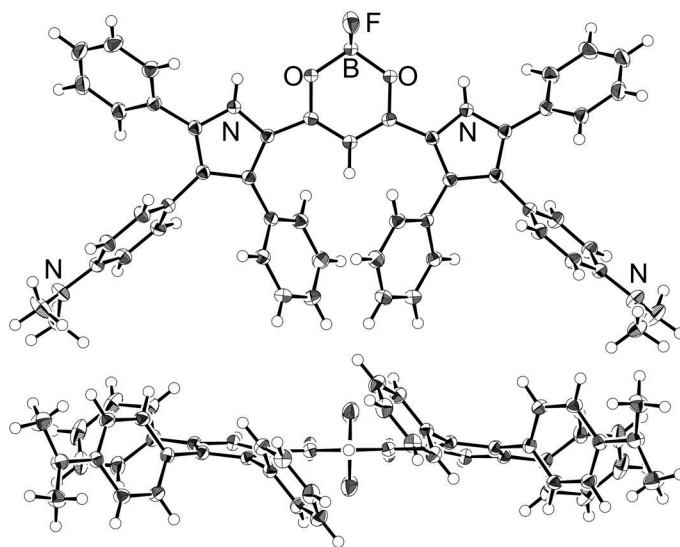

Fig. S5 Ortep drawing of single-crystal X-ray structure (top and side views) of 3a. Thermal ellipsoids are scaled to the 50% probability level. Solvent molecules are omitted for clarity.

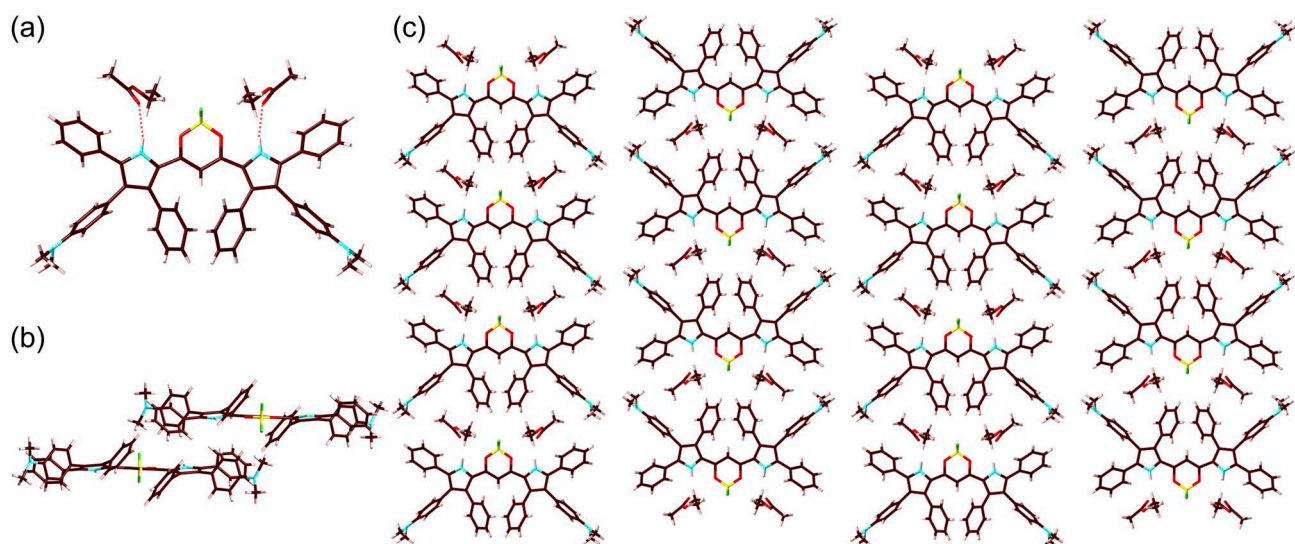

**Fig. S6** Packing diagrams of **3a**: (a) a hydrogen-bonding structure with an N(-H)···O distance of 2.922 Å, (b) a stacking with a π-π distance of 4.396 Å, which was estimated by using the average distance between mean planes of five- and six-membered rings (pyrrole and core 1,3-diketone boron complex, respectively), suggesting the absence of π-π interaction in the solid state, and (c) packing diagram. Atom color code: brown, pink, yellow, blue, red, and green refer to carbon, hydrogen, boron, nitrogen, oxygen, and fluorine, respectively.

### 3. Theoretical study

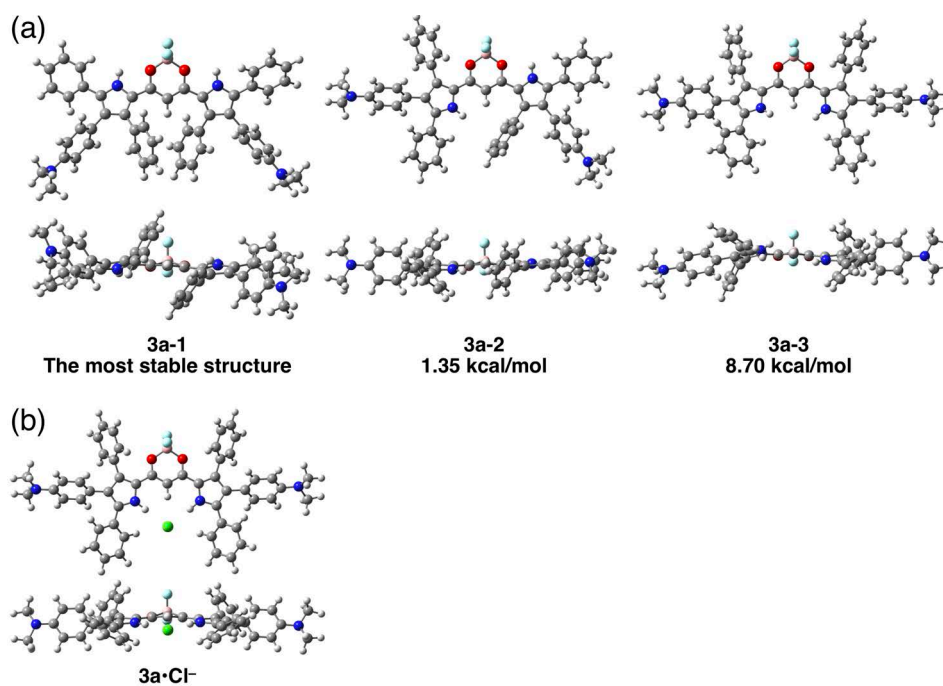

**Fig. S7** Optimized structures (top and side views) of (a) **3a** (**3a-1**: pyrrole-non-inverted conformation; **3a-2**: one-pyrrole-inverted conformation; **3a-3**: two-pyrrole-inverted conformation) and (b) **3a·Cl<sup>-</sup>** at B3LYP/6-31+G(d,p). The difference in energy changes by the pyrrole inversion from **3a-1** to **3a-2** and that from **3a-2** to **3a-3** is probably due to the release of sterical hindrance of 3-phenyl moieties in **3a-1** by the first pyrrole inversion.

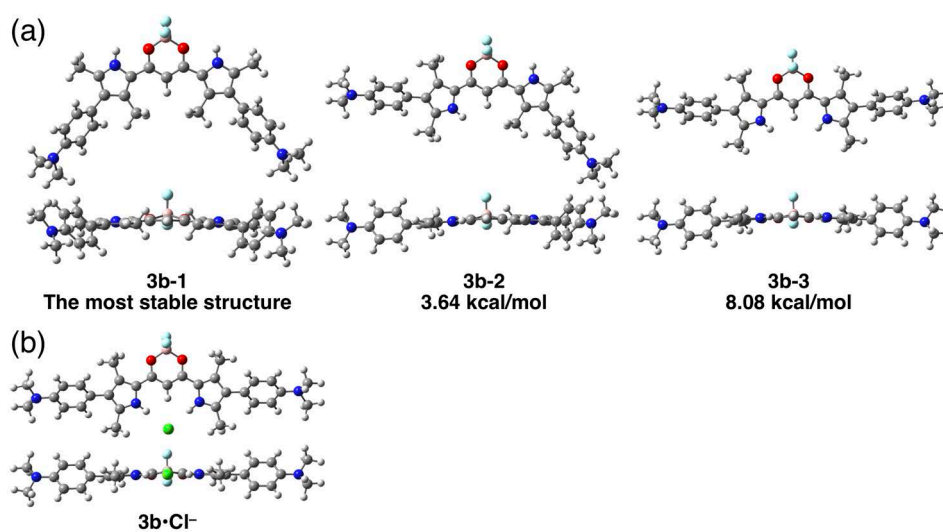

**Fig. S8** Optimized structures (top and side views) of (a) **3b** (**3b-1**: pyrrole-non-inverted conformation; **3b-2**: one-pyrrole-inverted conformation; **3b-3**: two-pyrrole-inverted conformation) and (b) **3b·Cl<sup>-</sup>** at B3LYP/6-31+G(d,p).

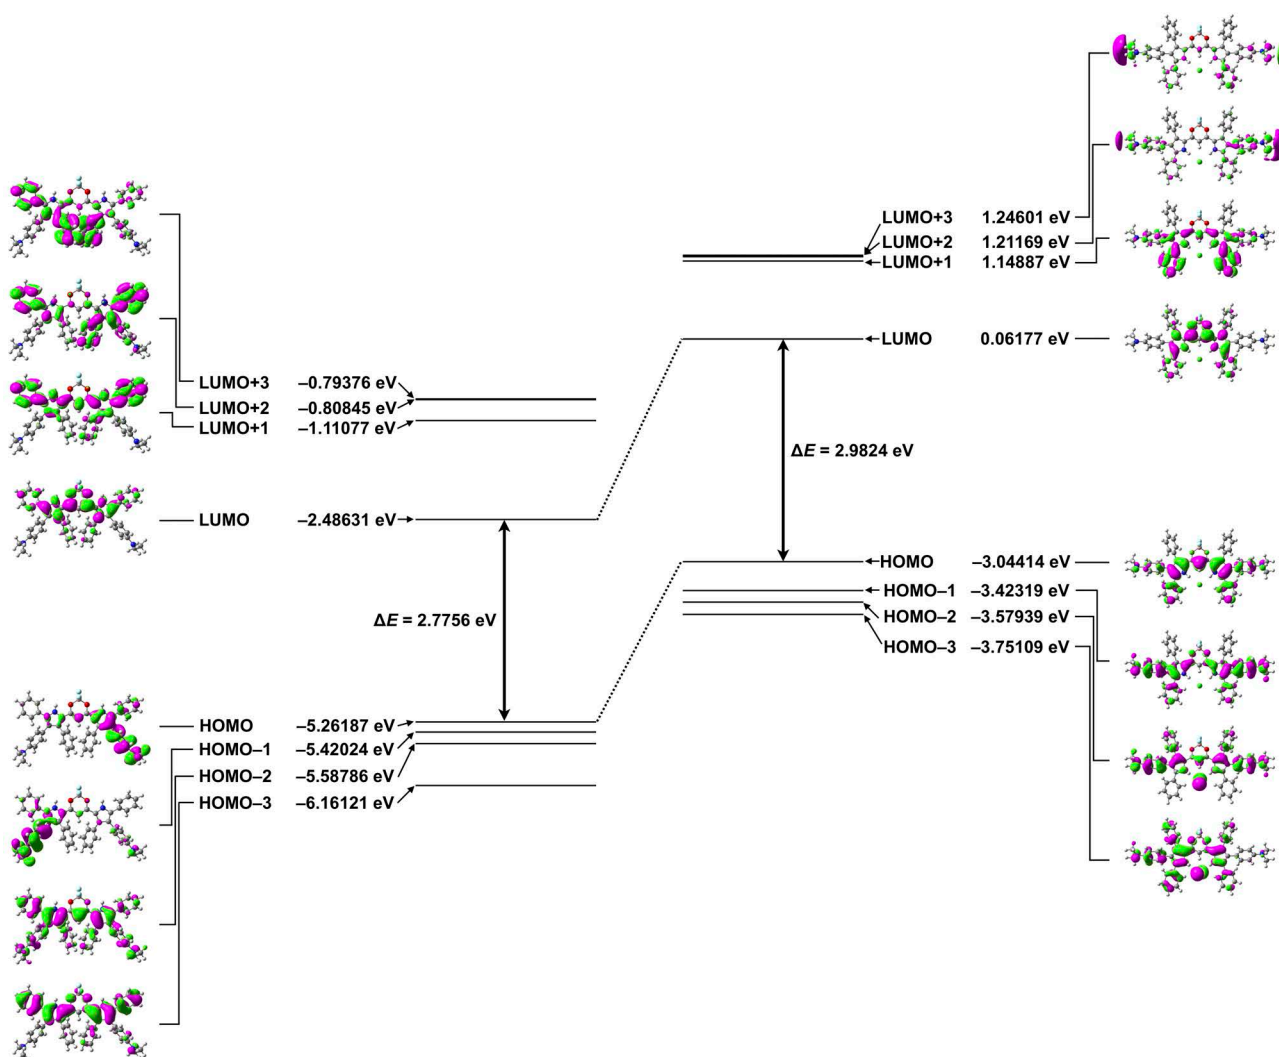

**Fig. S9** Molecular orbitals (HOMO/LUMO) of **3a** (left) and **3a·Cl<sup>-</sup>** (right) estimated at B3LYP/6-31+G(d,p).



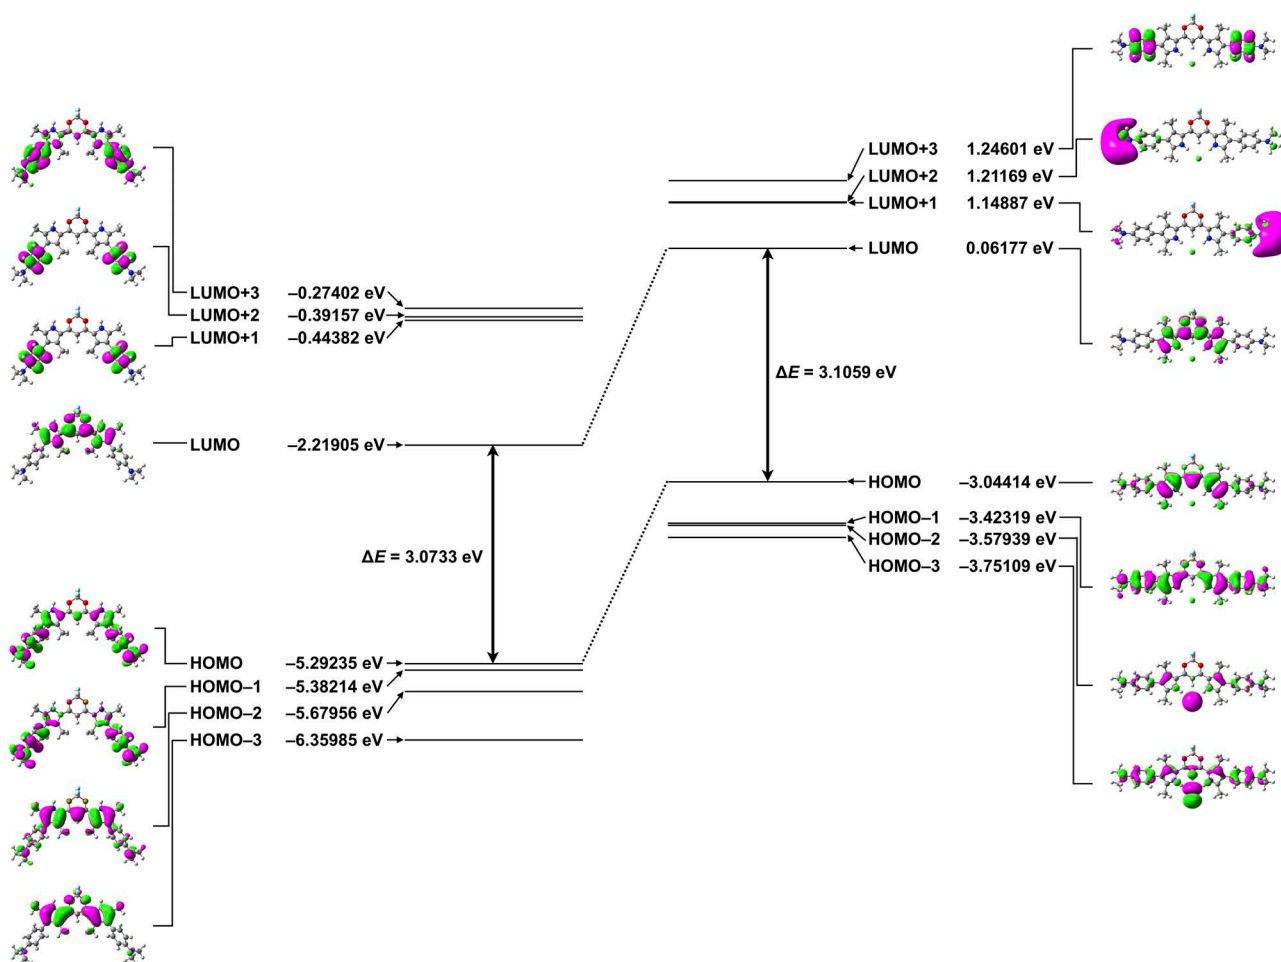

Fig. S10 Molecular orbitals (HOMO/LUMO) of **3b** (left) and **3b**·Cl<sup>-</sup> (right) estimated at B3LYP/6-31+G(d,p).

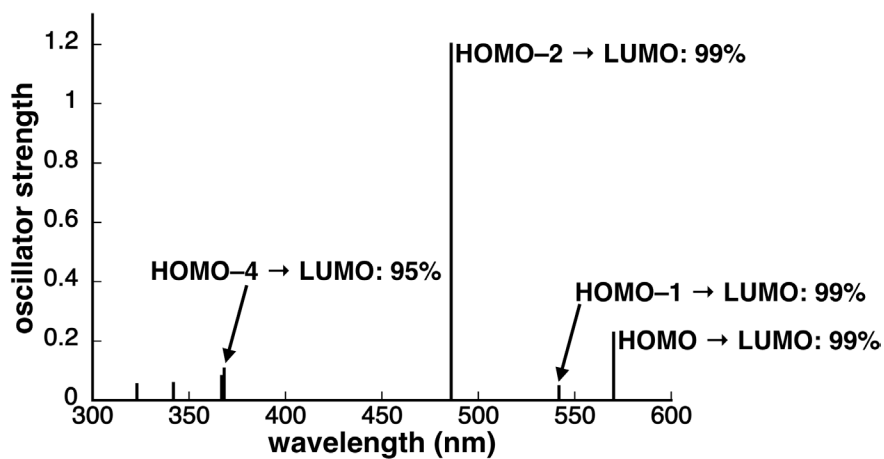

Fig. S11 TD-DFT-based UV/vis absorption stick spectrum of **3a** with the transitions correlated with molecular orbitals (MOs) estimated at PCM-B3LYP/6-31+G(d,p)(CH<sub>2</sub>Cl<sub>2</sub>)/B3LYP/6-31+G(d,p).

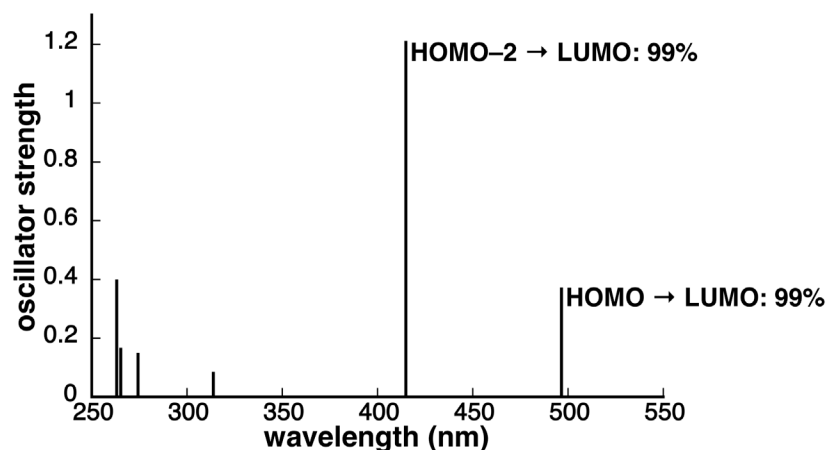

**Fig. S12** TD-DFT-based UV/vis absorption stick spectrum of **3b** with the transitions correlated with MOs estimated at PCM-B3LYP/6-31+G(d,p)(CH<sub>2</sub>Cl<sub>2</sub>)/B3LYP/6-31+G(d,p).

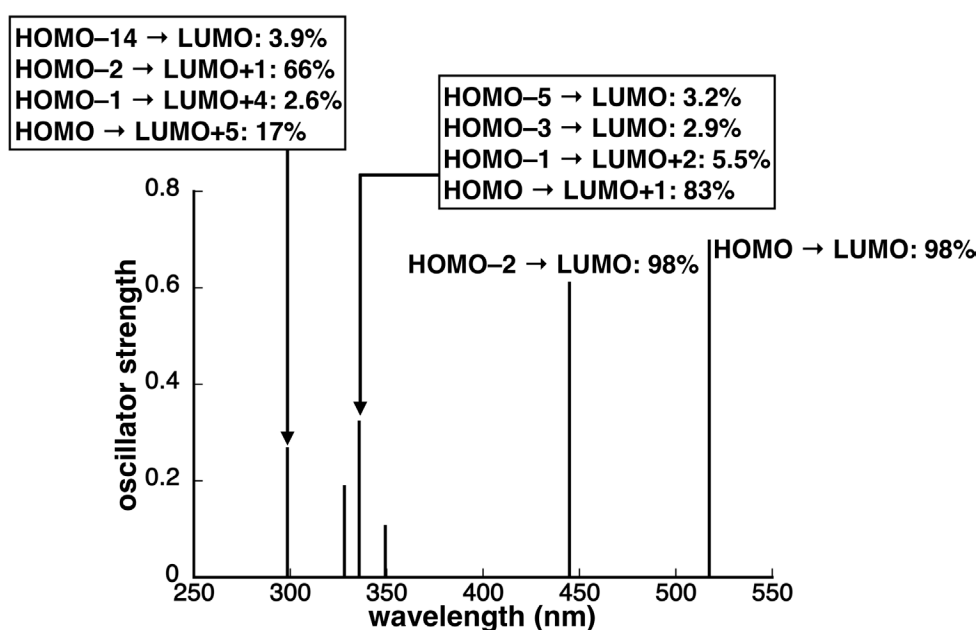

**Fig. S13** TD-DFT-based UV/vis absorption stick spectrum of **3a·Cl<sup>-</sup>** with the transitions correlated with MOs estimated at PCM-B3LYP/6-31+G(d,p)(CH<sub>2</sub>Cl<sub>2</sub>)/B3LYP/6-31+G(d,p).

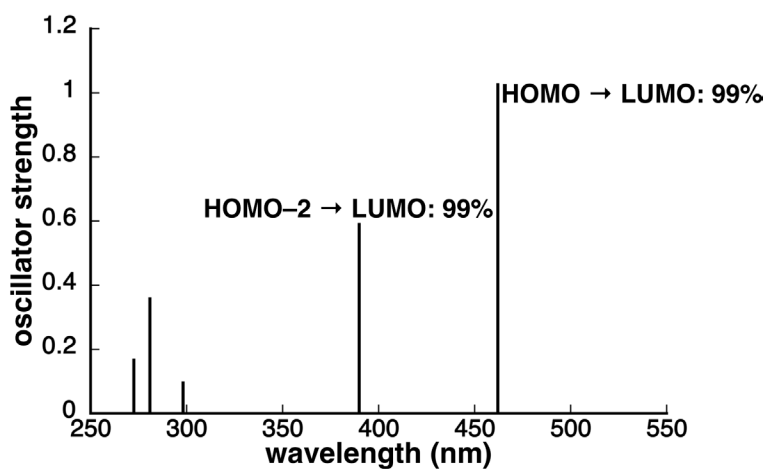

**Fig. S14** TD-DFT-based UV/vis absorption stick spectrum of **3b·Cl<sup>-</sup>** with the transitions correlated with MOs estimated at PCM-B3LYP/6-31+G(d,p)(CH<sub>2</sub>Cl<sub>2</sub>)/B3LYP/6-31+G(d,p).

### Cartesian Coordination of 3a-1

-2563.6979197 hartree  
H,-3.4258054453,3.2861489952,-0.7427857003  
H,3.4591632231,3.3493234291,0.5782933887  
O,-1.2183506876,3.4421163606,-0.0774802168  
O,1.2136243196,3.4506972828,0.0886409669  
F,0.0200290745,5.3876565642,-0.4641810463  
F,-0.1173497916,4.547052652,1.6802484225  
C,-1.2111358032,2.1283905945,0.0444828813  
C,4.4597122053,0.357806708,-0.0339700101  
C,-2.5252641987,1.5384373499,-0.0108136786  
C,-4.4457529792,0.3120068444,-0.0763379305  
C,-0.0066813221,1.4214555401,0.1348081187  
C,1.1966273364,2.1334188928,0.0875144803  
C,2.5169556094,1.5484883663,0.0562549322  
B,-0.0284827343,4.2611106892,0.3232686445  
N,-3.5676197546,2.334021615,-0.4346052346  
N,3.5754118632,2.3606406099,0.4026117221  
C,-3.0582185686,0.2601621033,0.249555439  
C,3.0485839468,0.2775278397,-0.2346408047  
H,-0.0048115667,0.3439723046,0.1873283798  
C,2.326620334,-0.9121729925,-0.742440875  
C,1.5723986917,-0.8375567795,-1.9269933673  
C,2.4415312592,-2.1556214158,-0.0987242294  
C,0.9554975551,-1.973426018,-2.4541254498  
H,1.4853731094,0.1138631182,-2.4435446784  
C,1.8254681212,-3.2911070657,-0.6268297735  
H,3.0213064541,-2.2299855274,0.8156409397  
C,1.0838656339,-3.2058739285,-1.8078217857  
H,0.3826758384,-1.8957695683,-3.3740532761  
H,1.92706902,-4.2433850354,-0.1142052552  
H,0.609518264,-4.0915568087,-2.2210087738  
C,-2.3741622301,-0.8621640348,0.9336484917  
C,-1.8160402236,-0.6629770531,2.2100980857  
C,-2.316941635,-2.1481939319,0.373855001  
C,-1.2213784026,-1.7174426464,2.9036305591  
H,-1.8625299587,0.3233377261,2.6622256378  
C,-1.7243112942,-3.2039931336,1.0693124525  
H,-2.7303579703,-2.3199325787,-0.6136780683  
C,-1.1765807191,-2.9941910024,2.3366222121  
H,-0.8005446229,-1.5421619194,3.889696383  
H,-1.6882559108,-4.1904778851,0.6163169904  
H,-0.7170304893,-3.8167275154,-2.8772228335  
C,4.7533279863,1.6781236279,0.3591225182  
C,-4.7297832913,1.6254758933,-0.5011174844  
C,6.0213332527,2.3509441422,0.6788519224  
C,6.0654303833,3.34805769,1.6723136708  
C,7.2049493339,2.0446962024,-0.0180347536  
C,7.2539226681,4.022135172,1.9555470246  
H,5.17146708,3.5810790022,2.2443852512  
C,8.3915587034,2.7175101659,0.2713975944  
H,7.1883626251,1.2866081926,-0.7928725934  
C,8.4227027238,3.7093409514,1.2567280154  
H,7.2666480818,4.7857020836,2.7278451631  
H,9.2937230503,2.4713171183,-0.2812038245  
H,9.3484555941,4.2324234454,1.4776095119  
C,-5.9809330761,2.2713486573,-0.9200719608  
C,-6.9846249018,1.5546884627,-1.5984130543  
C,-6.1930616847,3.6406229045,-0.6630590093  
C,-8.1565406275,2.189984275,-2.0079289026

H,-6.8411146113,0.5016861844,-1.8095845987  
C,-7.3640345144,4.2733205523,-1.0799977359  
H,-5.4524341182,4.2097043624,-0.1080097756  
C,-8.3519151253,3.5508909017,-1.7547111585  
H,-8.917179043,1.6196032844,-2.5332353001  
H,-7.5077983006,5.328676754,-0.867498451  
H,-9.265153653,4.0424230658,-2.0768649895  
C,5.439204274,-0.7426721623,-0.1945067921  
C,6.2601286655,-1.1503558432,0.8683990247  
C,5.5937027407,-1.4205601737,-1.4136008064  
C,7.1899055753,-2.177714988,0.7296080903  
H,6.1744161053,-0.650485498,1.829337002  
C,6.5179372863,-2.4503549244,-1.5710278352  
H,4.9835199138,-1.1328818575,-2.2648808963  
C,7.3374148191,-2.8690275562,-0.4961719133  
H,7.7968559667,-2.440619889,1.587007565  
H,6.5943211345,-2.927482839,-2.5400986387  
C,-5.4437610595,-0.7711973928,0.1204548107  
C,-6.2937942339,-0.7799677793,1.2361422229  
C,-5.5864328737,-1.8241647081,-0.7946645556  
C,-7.240484635,-1.7821428984,1.433395145  
H,-6.2100283752,0.0136660246,1.9735238867  
C,-6.5287919917,-2.8348801721,-0.6166563525  
H,-4.951835636,-1.8538591897,-1.6767036825  
C,-7.3940442288,-2.8365200776,0.5026433543  
H,-7.8591465876,-1.736444452,2.3209571653  
H,-6.5849382616,-3.6218029752,-1.3586015427  
N,-8.3630983151,-3.8215986068,0.672040302  
N,8.2360615605,-3.9237531328,-0.6333439876  
C,-9.0488507926,-3.9261181061,1.9513588153  
H,-9.791510334,-4.723485592,1.8921800713  
H,-8.3650981521,-4.1495319345,2.7865717973  
H,-9.582299875,-2.9990894582,2.1857219399  
C,-8.3068163397,-5.0179915814,-0.153981686  
H,-9.1527333732,-5.6611414571,0.0940734789  
H,-8.3892099557,-4.7651831197,-1.2163512789  
H,-7.3783902351,-5.5945898111,-0.0094294425  
C,9.2356168624,-4.1399660472,0.4015676635  
H,9.8305354025,-5.0176191131,0.1434125327  
H,9.9175371499,-3.2824815174,0.5242419266  
H,8.761816153,-4.3390255447,1.3685766761  
C,8.530205989,-4.4336161213,-1.9637846123  
H,9.2249494279,-5.2707547416,-1.877855307  
H,7.6228346103,-4.8094719645,-2.44805776  
H,8.981872532,-3.6746156357,-2.6236002683

### Cartesian Coordination of 3a-2

-2563.6957656 hartree  
H,-1.5050218544,-0.812148427,-0.6764525969  
H,3.5050802586,3.4786887356,-0.6823095526  
O,-1.2258287624,3.1713577468,-1.0031896793  
O,1.2109134514,3.3600591121,-0.9165634184  
F,-0.1202807091,5.1182879278,-1.6931221154  
F,-0.1620102816,4.5754330101,0.5515406952  
C,-1.1288784835,1.9048250355,-0.6968965421  
C,4.6104508991,0.5089128419,-0.1322243596  
C,-2.3546799575,1.1441371796,-0.6815194495  
C,-4.494266518,0.3479838117,-0.6946108021  
C,0.1231639588,1.3212225449,-0.4353596929  
C,1.2807590463,2.0831231528,-0.6068656569

C,2.6286771252,1.5859459294,-0.4688792368  
B,-0.0859420493,4.1151294641,-0.7587174762  
N,-2.3367846945,-0.2407731926,-0.6939952961  
N,3.6587595399,2.4997061653,-0.4815611232  
C,-3.7070533717,1.53856093,-0.6854380803  
C,3.203671832,0.3198276072,-0.2549251739  
H,0.2101818022,0.2939885677,-0.118983271  
C,2.4949328955,-0.9799523937,-0.152231493  
C,1.8623623292,-1.5469219336,-1.2722292462  
C,2.4605562911,-1.6809565437,1.0639931251  
C,1.2021656597,-2.7743068206,-1.1738966871  
H,1.8950887916,-1.0218138919,-2.228588811  
C,1.7973742147,-2.9064231774,1.1637282118  
H,2.9538777156,-1.2583126364,1.933802601  
C,1.1636490981,-3.4567734926,0.0464312348  
H,0.7288942178,-3.2029110932,-2.0532336392  
H,1.7766882932,-3.4306199207,2.1147804302  
H,0.6481478231,-4.4094799343,0.1238211379  
C,-4.2436994236,2.9203871238,-0.6799623642  
C,-5.1465372637,3.3288773375,-1.6749718877  
C,-3.8876162262,3.8364438786,0.3228380323  
C,-5.6713233418,4.6224011528,-1.6733715733  
H,-5.4302887305,2.6313777544,-2.4567962724  
C,-4.4143387095,5.1280150383,0.3260519449  
H,-3.1846446005,3.5414365879,1.0952832468  
C,-5.3081079863,5.5264139666,-0.6719747373  
H,-6.3602295953,4.9236976704,-2.4575488003  
H,-4.1163574884,5.825515348,1.1033200296  
H,-5.7123917331,6.5346948163,-0.6724323864  
C,4.8610744764,1.8875490971,-0.291034252  
C,-3.6064432976,-0.7419469337,-0.6991228376  
C,6.1086813955,2.6651287825,-0.2937637547  
C,6.1317308136,3.9748265706,0.2232736675  
C,7.2935894055,2.1373532831,-0.8395551585  
C,7.3011934873,4.7351455236,0.1893006965  
H,5.2379620389,4.3931738707,0.6781817774  
C,8.4615066161,2.898639484,-0.8664543915  
H,7.291994367,1.1339741964,-1.2503702597  
C,8.471658609,4.2000877228,-0.3548435689  
H,7.2982517392,5.7421843276,0.5960305023  
H,9.3650606123,2.4761815947,-1.2965270075  
H,9.382693142,4.7906648476,-0.3797060379  
C,-3.8399965092,-2.1944876761,-0.7005935554  
C,-4.8626421492,-2.765158025,0.0792724066  
C,-3.0247793757,-3.0477098644,-1.4680655062  
C,-5.0589986415,-4.1456046677,0.0899054154  
H,-5.4964557006,-2.1225556982,0.6801496033  
C,-3.2229116675,-4.4293117521,-1.4532685565  
H,-2.2509202098,-2.6256235901,-2.1036291354  
C,-4.2410517136,-4.984321993,-0.6740850605  
H,-5.8509698703,-4.5680199363,0.7015101435  
H,-2.589708427,-5.0699902894,-2.0605070129  
H,-4.3982885987,-6.0588585486,-0.6643713306  
C,5.610936071,-0.5442928238,0.1554629676  
C,6.4679950188,-0.457700074,1.2641629248  
C,5.7422200037,-1.677906569,-0.6616847641  
C,7.4077599464,-1.4449330007,1.5479202193  
H,6.4020797685,0.4036682169,1.9230740906  
C,6.6765054231,-2.6752631013,-0.3937027153  
H,5.1079041887,-1.7810560608,-1.5373132949

C,7.530814687,-2.5942144998,0.7312674639  
H,8.0411914513,-1.3157599708,2.4167138725  
H,6.733095247,-3.5198810072,-1.0690631878  
C,-5.9728597225,0.2636884827,-0.7136422077  
C,-6.6546612721,-0.4446825572,-1.7151420563  
C,-6.756482659,0.8999619514,0.2616868474  
C,-8.0444912793,-0.5279230573,-1.7427725473  
H,-6.0878228048,-0.9350533897,-2.501744967  
C,-8.1465268857,0.8265326022,0.2504511512  
H,-6.2705358524,1.4727074168,1.0459099168  
C,-8.8335626792,0.0966617441,-0.7482476447  
H,-8.5101749554,-1.0802302673,-2.5494023978  
H,-8.6936378356,1.3466665306,1.0265672787  
N,-10.2221499085,-0.0121475555,-0.7446115425  
N,8.4384891719,-3.6055231702,1.0303324895  
C,-10.8923678984,-0.5356337581,-1.9251533658  
H,-11.9658805428,-0.5801930534,-1.7339467254  
H,-10.7253743855,0.0825446463,-2.8226502318  
H,-10.5570698086,-1.5544274164,-2.1458004554  
C,-10.9961384231,0.8582736433,0.1282032736  
H,-12.0548601158,0.6151038631,0.0235711637  
H,-10.7265146192,0.6998422487,1.1775187269  
H,-10.8605504229,1.9274676354,-0.102945974  
C,9.45618421,-3.3686206177,2.0426572134  
H,10.0524442498,-4.2741606197,2.1657952761  
H,10.1346045682,-2.5395590337,1.7826044258  
H,8.9990880128,-3.1432171728,3.0120280303  
C,8.7073629705,-4.6330875385,0.0361858908  
H,9.4150601823,-5.3526174479,0.4510137636  
H,7.7939690178,-5.1813695061,-0.2179410101  
H,9.1332555376,-4.2261044081,-0.8955804307

### Cartesian Coordination of 3a-3

-2563.6840633 hartree  
H,-1.8521316773,1.4868696726,-1.1349057002  
H,1.7530439629,1.6009083444,0.4150845134  
O,-1.2193908441,-2.3377442179,-0.1573657383  
O,1.2290629572,-2.3319412099,-0.0537170765  
F,-0.0089103088,-4.2811428786,0.3333180699  
F,0.0761414807,-3.3968443173,-1.799223412  
C,-1.2109975557,-1.0394523001,-0.2788665455  
C,4.6673745072,0.3010737372,0.1432017554  
C,-2.4936008906,-0.3789345616,-0.3493274924  
C,-4.6698971763,0.3058048517,-0.2278404585  
C,0.0053514574,-0.3350377611,-0.3104706841  
C,1.2134266741,-1.0308346415,-0.1362136021  
C,2.4849214358,-0.3568243057,0.0008982963  
B,0.0221420885,-3.1467603058,-0.4317907745  
N,-2.5776471878,0.9708142598,-0.6604516609  
N,2.548267781,0.9973456234,0.2797181241  
C,-3.7987938493,-0.8168042473,-0.0587112041  
C,3.8107947501,-0.819987007,-0.0861822232  
H,0.0082229826,0.7417299924,-0.4001014909  
C,4.2648688588,-2.2028513808,-0.3671676244  
C,3.8592054059,-2.8826466302,-1.5265576953  
C,5.1371064848,-2.850181485,0.5228813548  
C,4.3086988922,-4.17757376,-1.785686778  
H,3.1781384584,-2.4016200295,-2.2214012188  
C,5.5847751392,-4.1467189759,0.26479456  
H,5.4577640799,-2.3369668657,1.4240865181

C,5.1735551701,-4.8145961833,-0.8913943903  
H,3.9731186849,-4.6913471836,-2.681694502  
H,6.2512027503,-4.635306308,0.9700312689  
H,5.5177228013,-5.8254299757,-1.090782578  
C,-4.225415941,-2.1527815968,0.4264337747  
C,-4.8714549846,-2.2707622619,1.6682936306  
C,-4.035322941,-3.3088627236,-0.3467943718  
C,-5.3058484959,-3.5142156662,2.1302914015  
H,-5.0287588342,-1.3839798976,2.2746709283  
C,-4.4764463878,-4.5504950293,0.1119998272  
H,-3.5279668431,-3.2359645921,-1.3026715984  
C,-5.1116953492,-4.6583309476,1.3522331353  
H,-5.794047432,-3.5879948918,3.0980299802  
H,-4.3110085944,-5.435225141,-0.4956914042  
H,-5.4469750799,-5.627108357,1.7115634254  
C,3.8453610739,1.4170349941,0.3702202099  
C,-3.8801360154,1.3915329586,-0.634725346  
C,4.1501559715,2.8304849514,0.6414920811  
C,3.3762900855,3.5640991626,1.5610934822  
C,5.1930120819,3.4899182362,-0.0349064522  
C,3.6312964782,4.9172685434,1.7912303118  
H,2.5931294139,3.065808104,2.1271620637  
C,5.4469235299,4.8406861352,0.2002038747  
H,5.7959770728,2.9403757175,-0.7492404524  
C,4.6677729703,5.5614260999,1.1111404151  
H,3.0283823789,5.4629949021,2.5113739884  
H,6.2529430107,5.3339873045,-0.3352855485  
H,4.8694954731,6.6131253113,1.2915882576  
C,-4.2205229112,2.7640795263,-1.0361566341  
C,-5.3794111336,3.0369105379,-1.7866106039  
C,-3.3663402881,3.8341987422,-0.7066129898  
C,-5.6697103493,4.3386152006,-2.1927493225  
H,-6.0449817428,2.223961932,-2.0546167407  
C,-3.6579253563,5.1353252086,-1.1191743397  
H,-2.4862243846,3.6512810801,-0.0956176556  
C,-4.8114156658,5.3930434098,-1.8640258475  
H,-6.5664543411,4.5290002397,-2.7752021964  
H,-2.9896505166,5.947883577,-0.8488597159  
H,-5.0411393387,6.4051837437,-2.1835254414  
C,6.1480766748,0.2961720309,0.1560495295  
C,6.8743192706,0.7912243606,1.2503683075  
C,6.8895954188,-0.1995818695,-0.9280449352  
C,8.2666171439,0.7962143894,1.2693075483  
H,6.3408239195,1.182472566,2.1122154622  
C,8.2814856869,-0.2026035183,-0.9265177542  
H,6.3683986362,-0.5910011036,-1.7966051932  
C,9.0138435276,0.2841278918,0.1823182511  
H,8.7673315474,1.1939320647,2.1432114589  
H,8.7945262112,-0.5931975422,-1.7963732108  
C,-6.1299650905,0.3363401518,0.0110302077  
C,-6.7146015803,1.2940572219,0.8543521805  
C,-6.9924127549,-0.5969372781,-0.5860446489  
C,-8.0871444867,1.3336141475,1.0847669395  
H,-6.0815345589,2.0218063737,1.3545357066  
C,-8.3668079486,-0.5715408941,-0.3681736542  
H,-6.5818718821,-1.3647595366,-1.2347586998  
C,-8.9587978062,0.4065145318,0.4658685653  
H,-8.473898631,2.0900462902,1.7562662009  
H,-8.9764825876,-1.3232298253,-0.8536587834  
N,-10.3361107201,0.4612612611,0.6585596733

N,10.404747868,0.2442506378,0.2100676901  
C,-10.8699336132,1.3144945519,1.7090230795  
H,-11.9597000614,1.2601364142,1.6919170164  
H,-10.5240375763,1.0236664356,2.7145715689  
H,-10.591742601,2.3604972639,1.5421272308  
C,-11.1561433688,-0.6616323242,0.2281915217  
H,-12.2038417869,-0.4348811341,0.4323443932  
H,-11.0609685132,-0.8253041304,-0.8503172301  
H,-10.8976669743,-1.6017540991,0.7419647842  
C,11.1148601487,0.9879664836,1.2389611273  
H,12.1867383524,0.8182708124,1.1245486739  
H,10.9282551785,2.0734006065,1.1882284921  
H,10.8340944446,0.6406708899,2.2388974361  
C,11.129396741,-0.0678709659,-1.0122345415  
H,12.1981827984,-0.0979585785,-0.79397676  
H,10.845217004,-1.0538961266,-1.393970497  
H,10.9595240423,0.6716730857,-1.8121298753

#### Cartesian Coordination of 3a·Cl<sup>-</sup>

-3024.0287723 hartree  
H,-1.76698825,1.7177796,-0.11564602  
H,1.79552428,1.68795671,-0.15174397  
O,-1.24569871,-2.27857933,0.18894848  
O,1.19900224,-2.29699082,0.21202634  
F,-0.04399616,-4.17198642,0.85911736  
F,-0.0178021,-3.55111286,-1.36386167  
C,-1.21665841,-0.99556583,-0.08805074  
C,4.68222133,0.22972571,-0.02588288  
C,-2.48980847,-0.30845687,-0.10669865  
C,-4.68055649,0.30985103,-0.05841298  
C,-0.00363264,-0.33524241,-0.30706983  
C,1.19560742,-1.01474951,-0.07016285  
C,0.248054482,-0.35047767,-0.08006426  
B,-0.02741776,-3.12006566,-0.03116881  
N,-2.57325516,1.07159209,-0.11671043  
N,2.58940083,1.02669096,-0.13676757  
C,-3.8055815,-0.81266146,-0.07404532  
C,3.78622668,-0.87649501,-0.01166304  
C,4.19131657,-2.30158941,0.06603541  
C,3.84250731,-3.21624811,-0.94118076  
C,4.97043457,-2.7581861,1.14137075  
C,4.25751475,-4.54640516,-0.87333239  
H,3.22590761,-2.88589227,-1.77087429  
C,5.38586005,-4.0895601,1.21124811  
H,5.24424245,-2.06396207,1.92988508  
C,5.03308106,-4.98929492,0.20241261  
H,3.96172027,-5.2397034,-1.65582861  
H,5.98138744,-4.4231207,2.05718896  
H,5.34989377,-6.02745624,0.25822217  
C,-4.23717379,-2.23155941,-0.06484401  
C,-5.0713896,-2.71408645,0.95677191  
C,-3.8569673,-3.1157495,-1.0881404  
C,-5.5082361,-4.04041654,0.95959821  
H,-5.37015168,-2.0452766,1.75793472  
C,-4.2930134,-4.44077387,-1.08704509  
H,-3.19983681,-2.76623106,-1.87783339  
C,-5.12238726,-4.90965932,-0.06381811  
H,-6.14525903,-4.39453311,1.76609027  
H,-3.97176681,-5.11012763,-1.88026117  
H,-5.45531408,-5.94426471,-0.05939186

C,3.8995493,1.40104233,-0.1148158  
C,-3.87683679,1.46926793,-0.09369269  
C,4.30071411,2.81555947,-0.2162357  
C,3.5028123,3.83641727,0.33464782  
C,5.47922729,3.18070851,-0.89688863  
C,3.88092469,5.17465273,0.21623036  
H,2.56876412,3.59333935,0.83084308  
C,5.85538949,4.51897997,-1.00608001  
H,6.09490782,2.41242892,-1.35040177  
C,5.0601673,5.52431689,-0.44652829  
H,3.24055353,5.9435327,0.63899938  
H,6.76645639,4.7764691,-1.540162  
H,5.35095255,6.56770245,-0.53691983  
C,-4.25281003,2.89345888,-0.13218385  
C,-5.43540194,3.3085845,-0.77623569  
C,-3.42796576,3.87580438,0.44877395  
C,-5.78921715,4.65668516,-0.82054996  
H,-6.07272513,2.57216762,-1.25170834  
C,-3.78349644,5.22415108,0.39468042  
H,-2.49085933,3.59582037,0.9188051  
C,-4.96694176,5.62280895,-0.23203857  
H,-6.70455477,4.95263825,-1.32660989  
H,-3.12244675,5.96264129,0.83925058  
H,-5.24038502,6.67400532,-0.27210297  
C,6.15849852,0.15509712,0.07128598  
C,6.86717518,0.8644117,1.05397509  
C,6.9175257,-0.63606826,-0.80470009  
C,8.25491653,0.79756715,1.15822726  
H,6.32048364,1.49139203,1.75240063  
C,8.30603537,-0.71739985,-0.71250129  
H,6.41213677,-1.20135762,-1.58181038  
C,9.01515564,-0.00979089,0.28293715  
H,8.73788703,1.37592893,1.93648989  
H,8.82932208,-1.34375595,-1.424519  
C,-6.15980389,0.25767725,0.01638679  
C,-6.86296208,0.86752153,1.06685235  
C,-6.92407919,-0.4273313,-0.94028723  
C,-8.25242035,0.81220776,1.15684449  
H,-6.30918999,1.39517654,1.8382223  
C,-8.31444685,-0.49394043,-0.86534  
H,-6.42020064,-0.92823369,-1.76151024  
C,-9.02081604,0.13780166,0.18188812  
H,-8.73079076,1.2999648,1.99732461  
H,-8.84216849,-1.04676706,-1.63273943  
N,-10.42307092,0.11322375,0.24120563  
N,10.40811838,-0.12226419,0.41360031  
C,-11.06586274,0.46950438,1.49619329  
H,-12.14935638,0.42269454,1.36586264  
H,-10.78612573,-0.19718616,2.33045988  
H,-10.81624978,1.49534105,1.7842561  
C,-11.13056884,-0.85088079,-0.58671656  
H,-12.205437,-0.72199753,-0.44116213  
H,-10.9222344,-0.67920925,-1.64730069  
H,-10.86940431,-1.89742654,-0.35256815  
C,11.11063013,0.88196974,1.19655707  
H,12.1753765,0.63872584,1.21235424  
H,10.99206722,1.90372567,0.79578532  
H,10.7615574,0.88291149,2.23371845  
C,11.15781004,-0.71749276,-0.68075137  
H,12.21355289,-0.76350045,-0.40411723

H,10.82447917,-1.74292879,-0.8672622  
H,11.06956851,-0.15250102,-1.62532999  
H,0.00565689,0.71892435,-0.54305522  
Cl,0.02768656,3.07459429,0.0250855

#### Cartesian Coordination of 3b-1

-1796.7117483 hartree  
H,-3.5171254369,3.5185703511,0.0004197812  
H,3.5410002671,3.4672479907,-0.2578695381  
O,-1.2059323154,3.5888469361,-0.0026685874  
O,1.2369205662,3.5709076781,-0.0945223475  
F,0.0082359002,5.4920791888,-0.6169853382  
F,0.0850169714,4.7631387416,1.5700454314  
C,-1.198038814,2.2744537633,0.1034166409  
C,4.394856827,0.3710042558,-0.1893449633  
C,-2.5041648133,1.6788549196,0.1267439247  
C,-4.4088715671,0.4370494192,0.173744369  
C,0.0080900882,1.5639336855,0.1489716694  
C,1.2173564282,2.2565181739,0.0090881328  
C,2.5121472276,1.6414256967,-0.0725312586  
B,0.0319063409,4.4050437987,0.228453154  
N,-3.6071700451,2.5139932475,0.0677389974  
N,3.6202565856,2.4607541949,-0.2078480819  
C,-2.98701114,0.3593158942,0.197000742  
C,2.9780661694,0.3141377476,-0.0556891833  
H,0.0032174648,0.4916493532,0.2271728335  
C,4.7576633534,1.7250665766,-0.2811542731  
C,-4.7575823688,1.7955919209,0.0928475367  
C,5.3307428265,-0.7753921574,-0.2333445287  
C,6.3753820348,-0.9152240997,0.6946102274  
C,5.2230938809,-1.7728667624,-1.2165823518  
C,7.2647332217,-1.98703112,0.6520197653  
H,6.4926641739,-0.1717437037,1.478688179  
C,6.0976475133,-2.8551456674,-1.2717723034  
H,4.4462571116,-1.6914108341,-1.9722241514  
C,7.1404984507,-3.0012968134,-0.3263520982  
H,8.05080791,-2.0341648043,1.3953899722  
H,5.9655142277,-3.5836441576,-2.0619920253  
C,-5.3639251893,-0.6931789677,0.2226858987  
C,-6.3286122674,-0.8024043652,1.2373140899  
C,-5.3459880451,-1.71338157,-0.7426823075  
C,-7.2332439436,-1.8608911962,1.2878470865  
H,-6.3621088097,-0.0504602849,2.0213710859  
C,-6.2367938676,-2.7831996037,-0.7053039822  
H,-4.622330831,-1.6658106624,-1.5520672084  
C,-7.2198478708,-2.8810766056,0.3078622256  
H,-7.9454407709,-1.8913308141,2.1030127449  
H,-6.1672061963,-3.5379725378,-1.4786874246  
N,-8.1400093533,-3.9257465142,0.3303016335  
N,7.9942120406,-4.1005540831,-0.3488214782  
C,-8.9620552566,-4.1188543594,1.5152239096  
H,-9.640913726,-4.9559100775,1.3441960851  
H,-8.3682031749,-4.3331125648,2.4189921662  
H,-9.5767032066,-3.2343839591,1.7129687718  
C,-7.9165662224,-5.082093847,-0.5242177448  
H,-8.741164753,-5.7848537389,-0.3943015388  
H,-7.8979738063,-4.7919852057,-1.5799884004  
H,-6.9744279614,-5.6070979814,-0.2959891509  
C,9.1979451794,-4.0793292318,0.468264483  
H,9.7274614352,-5.0255625954,0.3456875963

H,9.8844477747,-3.2602766374,0.1979211433  
H,8.9488152147,-3.9789831209,1.5299620438  
C,7.9865199434,-4.9788523438,-1.508444998  
H,8.6840282936,-5.8004000062,-1.3372840422  
H,6.99487133,-5.4182988526,-1.6595843929  
H,8.2790708572,-4.4638847236,-2.4382446099  
C,-2.1821358631,-0.900900433,0.3246408415  
H,-1.5654552004,-1.0887972508,-0.5632595076  
H,-1.5090506821,-0.8628946693,1.1891141892  
H,-2.8415695833,-1.7611710121,0.4574304958  
C,2.165831962,-0.9358426094,0.1176018833  
H,1.5687606282,-0.9039916846,1.036520453  
H,1.4734497662,-1.0973331074,-0.7180948159  
H,2.8196056735,-1.8083928149,0.1791619648  
C,6.0996805884,2.3622474609,-0.4482742319  
H,6.4604303036,2.8056531086,0.4886394936  
H,6.83253679,1.6186970857,-0.7682726938  
H,6.0691422551,3.1594045081,-1.1998412549  
C,-6.0991517738,2.4514211671,0.0223058997  
H,-6.8648277888,1.7161127999,-0.2334874555  
H,-6.3808773046,2.9084001625,0.9795651914  
H,-6.1147051384,3.2413655151,-0.7372642144

#### Cartesian Coordination of 3b-2

-1796.7059504 hartree

H,-1.8409093688,-0.6179878665,-0.1824869869  
H,3.4904763774,3.4004305883,0.2654502889  
O,-1.2629395614,3.3743505517,0.2058972234  
O,1.1820403828,3.4250958841,0.2797299595  
F,-0.0719787892,5.3793661863,0.0091309084  
F,-0.1136058529,4.284709859,2.0404206071  
C,-1.2233872885,2.068268532,0.109937555  
C,4.4461168998,0.3518522623,-0.0664561396  
C,-2.4900037283,1.4151237097,-0.0610009936  
C,-4.6840430227,0.8489155695,-0.285805806  
C,0.0050619648,1.3827948964,0.1436189371  
C,1.1982025079,2.1103664409,0.1886470825  
C,2.5166963367,1.543324643,0.1050520061  
B,-0.0703310038,4.1653923972,0.6567621226  
N,-2.6065897913,0.0363408149,-0.2081941425  
N,3.6019887333,2.4000854258,0.1712775436  
C,-3.7901106024,1.9461561414,-0.1127781655  
C,3.0258767713,0.2414329137,-0.0429415607  
H,0.0437512539,0.3081721873,0.069189741  
C,4.7670996396,1.7120590247,0.0700123802  
C,-3.9139516373,-0.3203245464,-0.3384669083  
C,5.4224709576,-0.7521542578,-0.2102952667  
C,6.3909715917,-1.014559287,0.7720634092  
C,5.4340597011,-1.5812120062,-1.3440759166  
C,7.3198869091,-2.0445089942,0.6393536232  
H,6.4158169227,-0.4033026727,1.6704362383  
C,6.350202048,-2.6197483644,-1.4923243796  
H,4.7202243605,-1.3980277676,-2.1429782844  
C,7.3160250208,-2.890791563,-0.4943257917  
H,8.0425174954,-2.1903994442,1.4326794932  
H,6.311520288,-3.2137067528,-2.3970219363  
C,-6.1597250655,0.9051530407,-0.3876457215  
C,-6.8425123261,0.3922997061,-1.5021033115  
C,-6.9455322037,1.4760602673,0.6270083428  
C,-8.2317730461,0.4313962496,-1.6015392741

H,-6.2736848897,-0.0306699102,-2.3261283091  
C,-8.3343733961,1.5294527581,0.5433936286  
H,-6.4599505843,1.884703938,1.5089362926  
C,-9.0217721359,0.9928815912,-0.5712098993  
H,-8.6955338978,0.0289062388,-2.4934726703  
H,-8.8811782759,1.9873696436,1.3581425947  
N,-10.4121911807,1.0049141846,-0.6429852078  
N,8.2110124627,-3.9502441079,-0.6154371156  
C,-11.0578407019,0.6765385066,-1.904625028  
H,-12.1401196072,0.7019289989,-1.767334203  
H,-10.794996969,1.3751637662,-2.7159641776  
H,-10.7926851686,-0.3358342929,-2.2273863089  
C,-11.1613830343,1.8240673578,0.2980908653  
H,-12.2285823792,1.6936223941,0.1114363931  
H,-10.9693453714,1.510722682,1.3296480451  
H,-10.9231244997,2.8970169579,0.2152120545  
C,9.3460032058,-4.0245361926,0.2921045961  
H,9.9213720762,-4.9243349754,0.0685767189  
H,10.0171459245,-3.1539717201,0.2096474381  
H,9.0122072714,-4.1002027416,1.3323506509  
C,8.3339945324,-4.629983843,-1.8958259654  
H,9.0457495051,-5.451002973,-1.7953710096  
H,7.3760618122,-5.0633111085,-2.2020654474  
H,8.6832982711,-3.9651876416,-2.7029938229  
C,-4.1723981306,3.394950802,-0.038445933  
H,-3.9691605428,3.8127531766,0.9537445313  
H,-3.592618874,3.9939184889,-0.7453931243  
H,-5.2355284897,3.5191616391,-0.2558765654  
C,2.2501073094,-1.0418680723,-0.1154771579  
H,1.5986711865,-1.1684786095,0.7576573288  
H,1.6192339789,-1.0926059938,-1.0121954365  
H,2.9309343792,-1.8953966801,-0.1426819787  
C,6.0944437013,2.3996587882,0.093015101  
H,6.3656744493,2.7302248992,1.1037584045  
H,6.8753558851,1.7213426434,-0.2566325388  
H,6.094258906,3.2843841985,-0.5540509663  
C,-4.3252933466,-1.75044288,-0.4820460808  
H,-5.3935565601,-1.8539800105,-0.2813129001  
H,-4.1383776541,-2.1323689216,-1.4940870336  
H,-3.7828077516,-2.3942371781,0.2205295004

#### Cartesian Coordination of 3b-3

-1796.6988676 hartree

H,-1.9381108865,-0.7290658577,0.0909154808  
H,1.899405628,-0.7568088749,0.0311905278  
O,-1.2178092796,3.2525398879,-0.2055467396  
O,1.2294745427,3.2357611747,-0.2311905448  
F,0.0134983112,5.168419271,-0.7353574953  
F,0.0309270937,4.3778791475,1.4337439541  
C,-1.2166545489,1.9477400784,-0.0934071872  
C,4.7054381226,0.7457062572,-0.2922125371  
C,-2.509927079,1.320823492,-0.1167737257  
C,-4.7283112954,0.8106255279,-0.1900906604  
C,-0.005558846,1.2420587978,0.0063498306  
C,1.2127011272,1.9310308383,-0.1198866618  
C,2.4962819618,1.286314007,-0.1727114092  
B,0.0145929996,4.0622231179,0.080856599  
N,-2.6787722298,-0.0579729881,-0.0323897347  
N,2.647371392,-0.0951102289,-0.0985459683  
C,-3.7910138556,1.8861070678,-0.2235071174

C,3.7828501289,1.8343120409,-0.3015330883  
H,-0.0120016092,0.1650500381,0.1032013622  
C,3.9653407405,-0.4353203645,-0.1617800458  
C,-4.0024005055,-0.3799312063,-0.0675241471  
C,6.1797890507,0.8268914139,-0.3950901376  
C,6.8897471658,0.1503434375,-1.3997030661  
C,6.9388490986,1.5789064547,0.5168651459  
C,8.2783106095,0.2149732295,-1.4966683135  
H,6.3442688843,-0.4341066503,-2.1362059818  
C,8.3262002343,1.6600709717,0.4332894055  
H,6.4338728861,2.1036564979,1.323236276  
C,9.0386602049,0.9878816403,-0.5881207315  
H,8.7640276405,-0.3313536789,-2.2957443563  
H,8.8514205798,2.2506821657,1.1736467519  
C,-6.2031246246,0.9110193902,-0.2658874663  
C,-6.9393659053,0.2477240294,-1.2604273763  
C,-6.9346864972,1.6827633375,0.6518586438  
C,-8.3278809265,0.3359748494,-1.3365307485  
H,-6.4139934185,-0.3363521809,-2.0117097635  
C,-8.3216943489,1.7870134634,0.5892071721  
H,-6.4073401861,2.2133155295,1.4398856152  
C,-9.0634623381,1.1025728865,-0.4026375554  
H,-8.8331808012,-0.1901716501,-2.1370024675  
H,-8.8236762274,2.4033665629,1.3246714767  
N,-10.4535061927,1.1702815005,-0.4486855869  
N,10.4215352575,1.0950006674,-0.7025503885  
C,-11.1455261787,0.677173419,-1.6296973858  
H,-12.2214613853,0.7819135629,-1.480758627  
H,-10.8677571525,1.2211175349,-2.5474695191  
H,-10.9396594999,-0.3866458578,-1.7883546505  
C,-11.1384253793,2.1712134045,0.3557773951  
H,-12.2153057455,2.0625921122,0.2167303554  
H,-10.9304093208,2.0264325678,1.4210331326  
H,-10.856006839,3.2024612303,0.0879330073  
C,11.1293788918,0.195581839,-1.6001861564  
H,12.1931302118,0.4378741151,-1.5805617683  
H,11.0105817222,-0.8653735936,-1.3248201115  
H,10.7847714485,0.3200403318,-2.632359976  
C,11.1792620197,1.6876963523,0.3889101542  
H,12.2346325979,1.7187109636,0.1133351456  
H,10.8591399784,2.7185255627,0.5735624557  
H,11.0836146709,1.1247122348,1.3318708005  
C,-4.123061715,3.3404598402,-0.3841269022  
H,-3.8982578738,3.9062970997,0.5268311237  
H,-3.5293649239,3.7965014513,-1.1801311049  
H,-5.1833549403,3.4640799309,-0.6152587236  
C,4.13220145,3.2848328775,-0.4601185257  
H,3.5350326933,3.7519866843,-1.2471181406  
H,3.925836196,3.8497986933,0.4556777278  
H,5.1910751373,3.3954674221,-0.7038578094  
C,4.4114345132,-1.8594751933,-0.0717701572  
H,4.2348698635,-2.4062595383,-1.0072184939  
H,5.4817840756,-1.9028601907,0.1395734453  
H,3.8852593835,-2.3933019197,0.728823966  
C,-4.4667034183,-1.797020349,0.0399409824  
H,-5.532945282,-1.8239837992,0.2736199159  
H,-4.3172325373,-2.3513883525,-0.8957431758  
H,-3.9316918501,-2.3338623976,0.8326186814

-2257.0423836 hartree  
H,1.70557043,-1.67920513,-0.23874976  
H,-1.73034354,-1.65709804,-0.21665442  
O,1.2496043,2.33188738,0.32074062  
O,-1.21556215,2.34758816,0.33731058  
F,0.03417589,4.15421829,1.14620425  
F,0.01614253,3.72809553,-1.11891384  
C,1.2151123,1.04193192,0.05086351  
C,-4.63943488,-0.28630911,0.03568154  
C,2.46854819,0.33693253,0.01088839  
C,4.63501749,-0.34552091,-0.02572106  
C,0.00127178,0.38369438,-0.14974488  
C,-1.20131,1.05738609,0.06676281  
C,-2.46413927,0.36859348,0.04333288  
B,0.02119861,3.17437224,0.16475709  
N,2.51394021,-1.04227753,-0.15095394  
N,-2.52927847,-1.00982885,-0.11824608  
C,3.79365043,0.79756844,0.0954814  
C,-3.78203623,0.84597523,0.14564708  
C,-3.81746391,-1.41932861,-0.12049552  
C,3.79669388,-1.46806871,-0.17008681  
C,-6.1162616,-0.29385523,0.06124964  
C,-6.84283826,-1.17390179,0.88074546  
C,-6.87508071,0.56923553,-0.74838253  
C,-8.23724947,-1.19711346,0.89750586  
H,-6.3050839,-1.85564144,1.53351449  
C,-8.26890628,0.56566793,-0.73869176  
H,-6.36127866,1.25060287,-1.42023575  
C,-8.9926428,-0.31269045,0.0973573  
H,-8.72901309,-1.90544953,1.55343821  
H,-8.78616646,1.25413362,-1.39616143  
C,6.11179889,-0.37451734,-0.02107055  
C,6.83617798,-1.25984007,0.79503968  
C,6.87257464,0.48117419,-0.83630634  
C,8.22998381,-1.30279078,0.79474198  
H,6.29710676,-1.92230142,1.46633325  
C,8.26647471,0.45796599,-0.84350636  
H,6.36056924,1.18000949,-1.49134398  
C,8.98737484,-0.44973731,-0.03704046  
H,8.71998385,-2.00657658,1.4568717  
H,8.78571004,1.14979751,-1.49582846  
N,10.3908571,-0.51785775,-0.07900373  
N,-10.39718553,-0.28985819,0.14928119  
C,11.07769567,-1.19977078,1.00624628  
H,12.15210969,-1.18773629,0.80913815  
H,10.89888197,-0.73600199,1.99232896  
H,10.76930921,-2.24805603,1.06436589  
C,11.11322098,0.58763277,-0.68811467  
H,12.18316774,0.36853528,-0.6639181  
H,10.82896448,0.70629687,-1.73813253  
H,10.94301535,1.55175933,-0.17741869  
C,-11.0794409,-1.41926995,0.76007306  
H,-12.155992,-1.23458782,0.74367787  
H,-10.88186553,-2.37616216,0.24540458  
H,-10.78438886,-1.53162594,1.80785051  
C,-11.11375629,0.37403279,-0.92793104  
H,-12.18550813,0.33014568,-0.7209577  
H,-10.83666427,1.43092655,-0.98613771  
H,-10.93067441,-0.08211491,-1.91680231  
C,4.2352419,2.21816468,0.30731588

### Cartesian Coordination of 3b·Cl<sup>-</sup>



H,4.13488668,2.81532542,-0.60795693  
H,3.62167862,2.71224279,1.06359467  
H,5.28308148,2.25244639,0.61913081  
C,-4.20293859,2.27190586,0.36352911  
H,-3.57348277,2.75797913,1.11189653  
H,-4.10698021,2.86809637,-0.55283618  
H,-5.24611365,2.31924882,0.68893861  
C,-4.16254236,-2.86661871,-0.28856898  
H,-4.26152007,-3.37636921,0.6786443

H,-5.11235618,-2.97790688,-0.81991198  
H,-3.37575859,-3.38433412,-0.84495575  
C,4.12184035,-2.91954432,-0.34146122  
H,5.06547319,-3.04261564,-0.88108221  
H,4.22290619,-3.43059292,0.62484537  
H,3.32370899,-3.42728617,-0.89083625  
H,-0.00686616,-0.66966874,-0.38806099  
Cl,-0.02384792,-3.10940321,-0.4591401

#### 4. Anion-binding and protonation behaviors

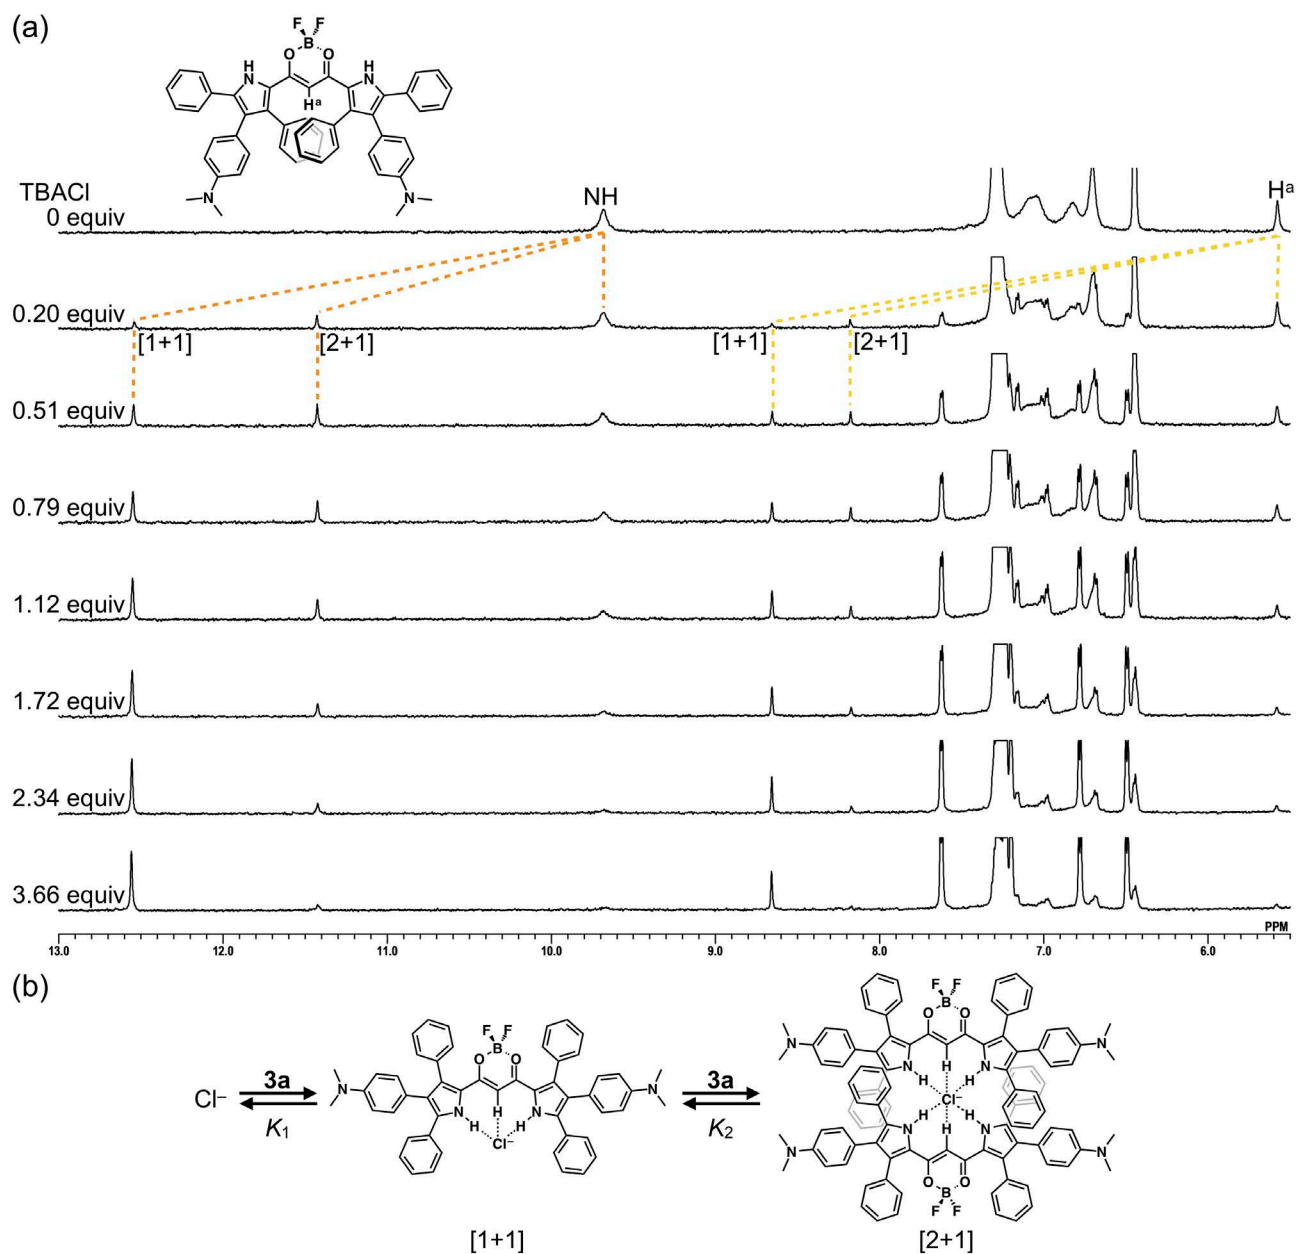

**Fig. S15** (a)  $^1\text{H}$  NMR spectral changes of **3a** ( $1 \times 10^{-3}$  M) upon the addition of  $\text{Cl}^-$  added as a tetrabutylammonium (TBA) salt (0–3.66 equiv) in  $\text{CD}_2\text{Cl}_2$  at  $-50$  °C and (b) formation of [1+1] and [2+1]-type  $\text{Cl}^-$  complexes. [1+1]- and [2+1]-type binding constants ( $K_1$  and  $K_2$ ) of **3a**, estimated from the integrals of the pyrrole NH signals, were  $2.7 \times 10^3$  and  $1.6 \times 10^3$   $\text{M}^{-1}$ , respectively.

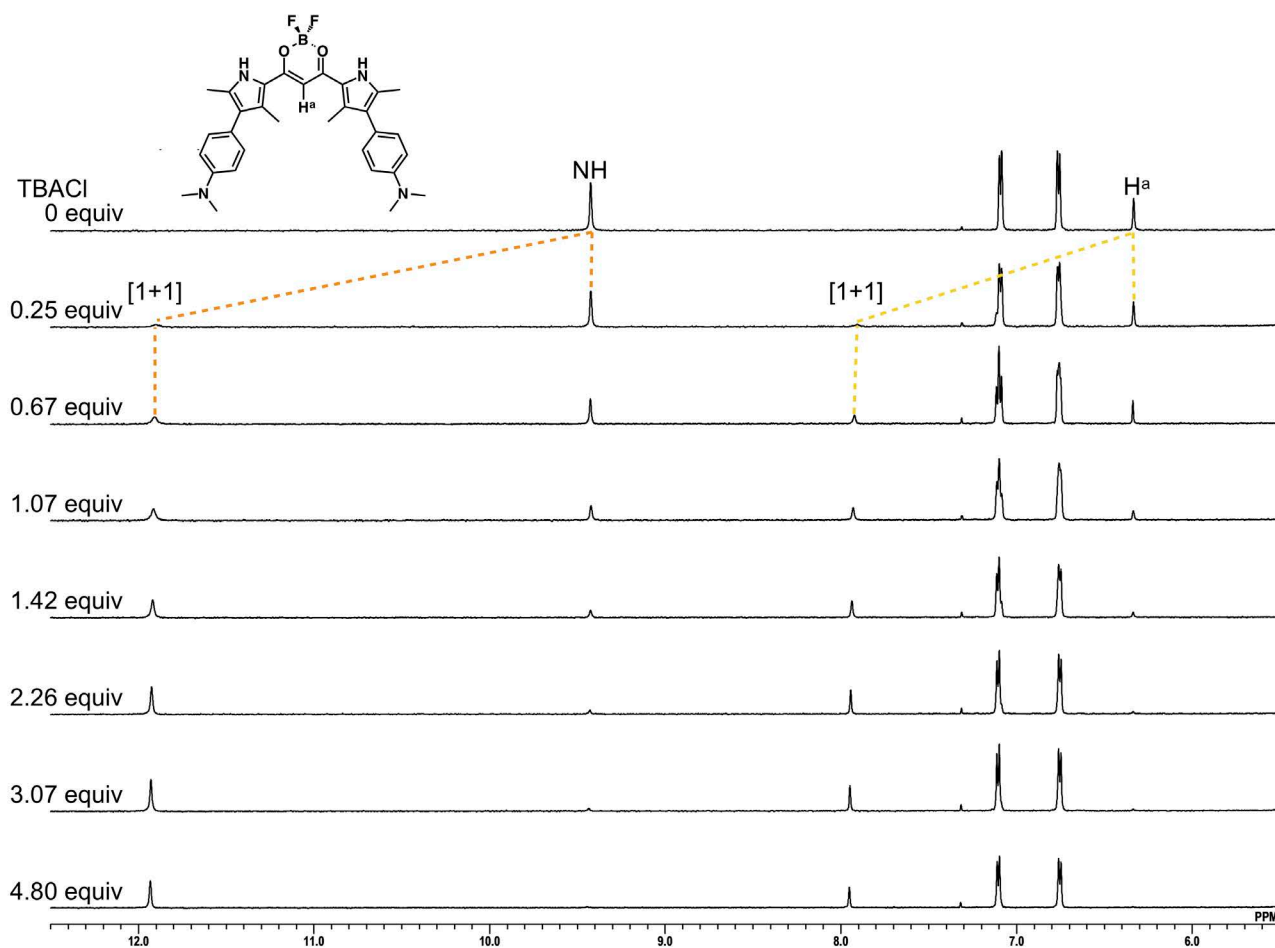

**Fig. S16**  $^1\text{H}$  NMR spectral changes of **3b** ( $1 \times 10^{-3}$  M) upon the addition of  $\text{Cl}^-$  as a TBA salt (0–4.80 equiv) in  $\text{CD}_2\text{Cl}_2$  at  $-50$  °C. [1+1]-Type binding constant ( $K_1$ ) of **3b**, estimated from the integrals of the pyrrole NH signals, was  $3.0 \times 10^3 \text{ M}^{-1}$ .

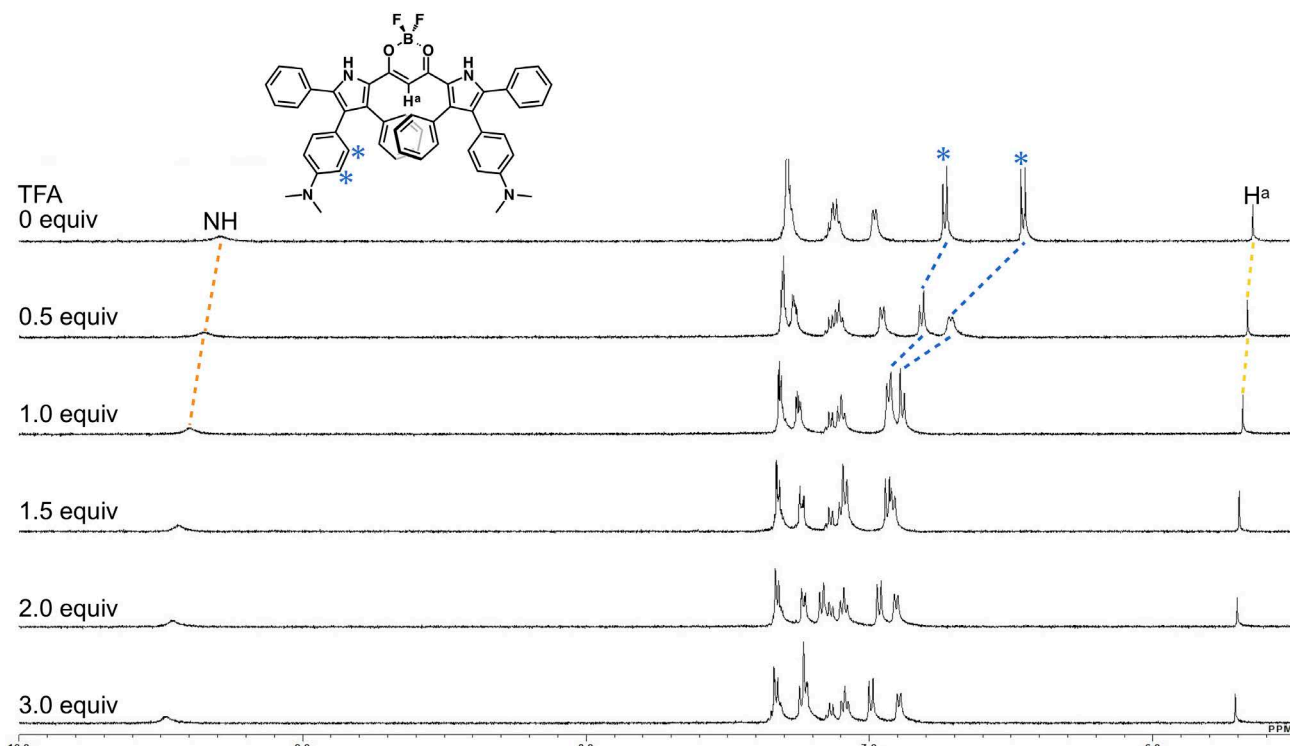

**Fig. S17**  $^1\text{H}$  NMR spectral changes of **3a** ( $1 \times 10^{-3}$  M) upon the addition of TFA (0–3.0 equiv) in  $\text{CD}_2\text{Cl}_2$  at 20 °C.  $^1\text{H}$  NMR signal of TFA and *N,N*-dimethylammonium NH could not be observed. The downfield shifts of *N,N*-dimethylaminophenyl aryl-H (blue asterisks) suggested the changes to electron-deficient states by the protonation. Slight downfield shifts, including those of pyrrole NH and bridging CH ( $\text{H}^a$ ), were also consistent with the protonation.

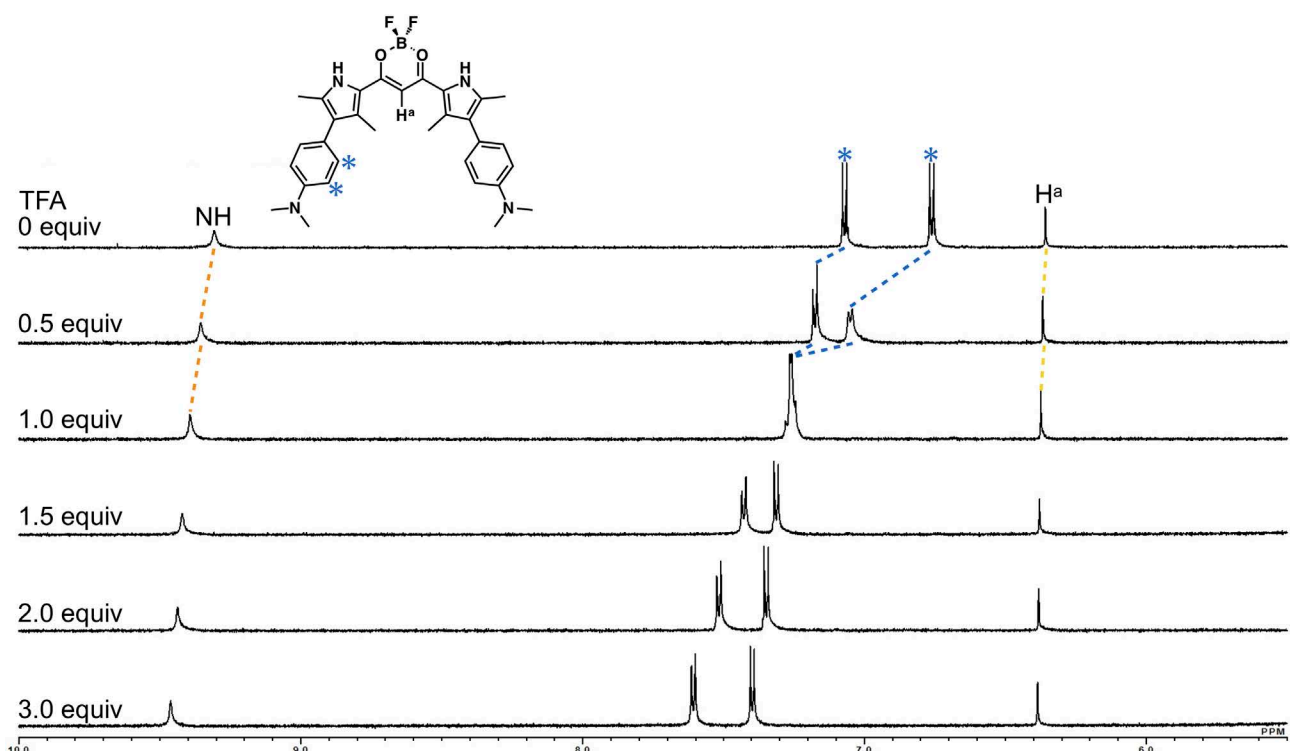

**Fig. S18**  $^1\text{H}$  NMR spectral changes of **3b** ( $1 \times 10^{-3}$  M) upon the addition of TFA (0–3.0 equiv) in  $\text{CD}_2\text{Cl}_2$  at 20 °C.  $^1\text{H}$  NMR signal of TFA and *N,N*-dimethylammonium NH could not be observed. The downfield shifts of *N,N*-dimethylaminophenyl aryl-H (blue asterisks) suggested the changes to electron-deficient states by the protonation. Slight downfield shifts, including those of pyrrole NH and bridging CH ( $\text{H}^a$ ), were also consistent with the protonation.

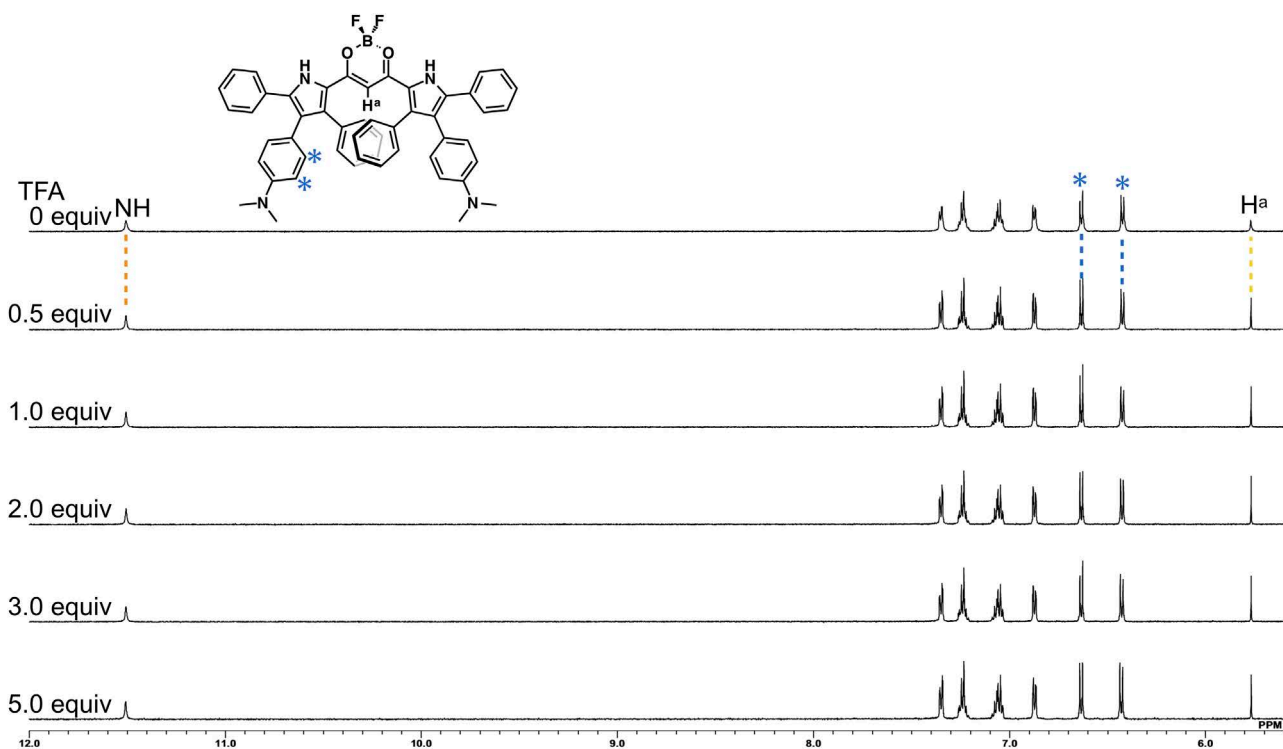

**Fig. S19**  $^1\text{H}$  NMR spectral changes of **3a** ( $1 \times 10^{-3}$  M) upon the addition of TFA (0–5.0 equiv) in  $\text{THF-}d_8$  at 20 °C.  $^1\text{H}$  NMR signal of TFA and *N,N*-dimethylammonium NH could not be observed. No  $^1\text{H}$  NMR signal changes of **3a** upon the addition of TFA suggested no protonation in THF.

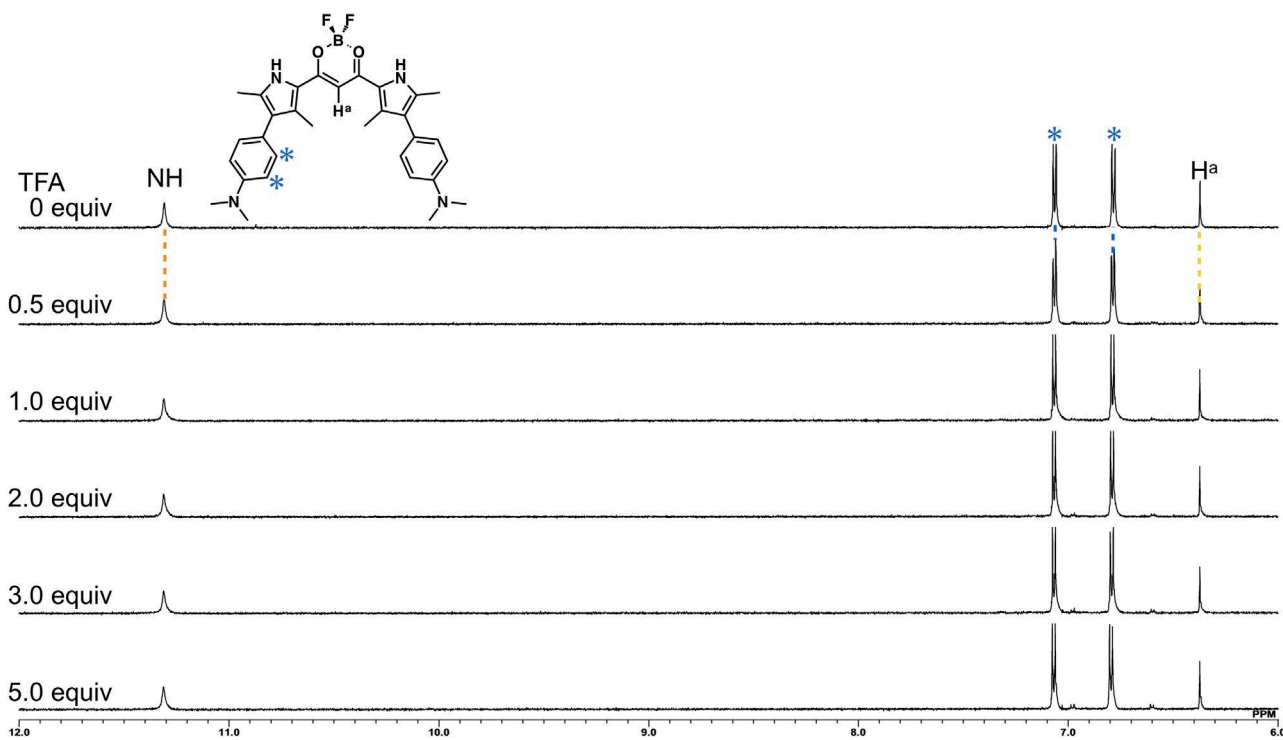

**Fig. S20**  $^1\text{H}$  NMR spectral changes of **3b** ( $1 \times 10^{-3}$  M) upon the addition of TFA (0–5.0 equiv) in  $\text{THF-}d_8$  at 20 °C.  $^1\text{H}$  NMR signal of TFA and *N,N*-dimethylammonium NH could not be observed. No  $^1\text{H}$  NMR signal changes of **3b** upon the addition of TFA suggested no protonation in THF.

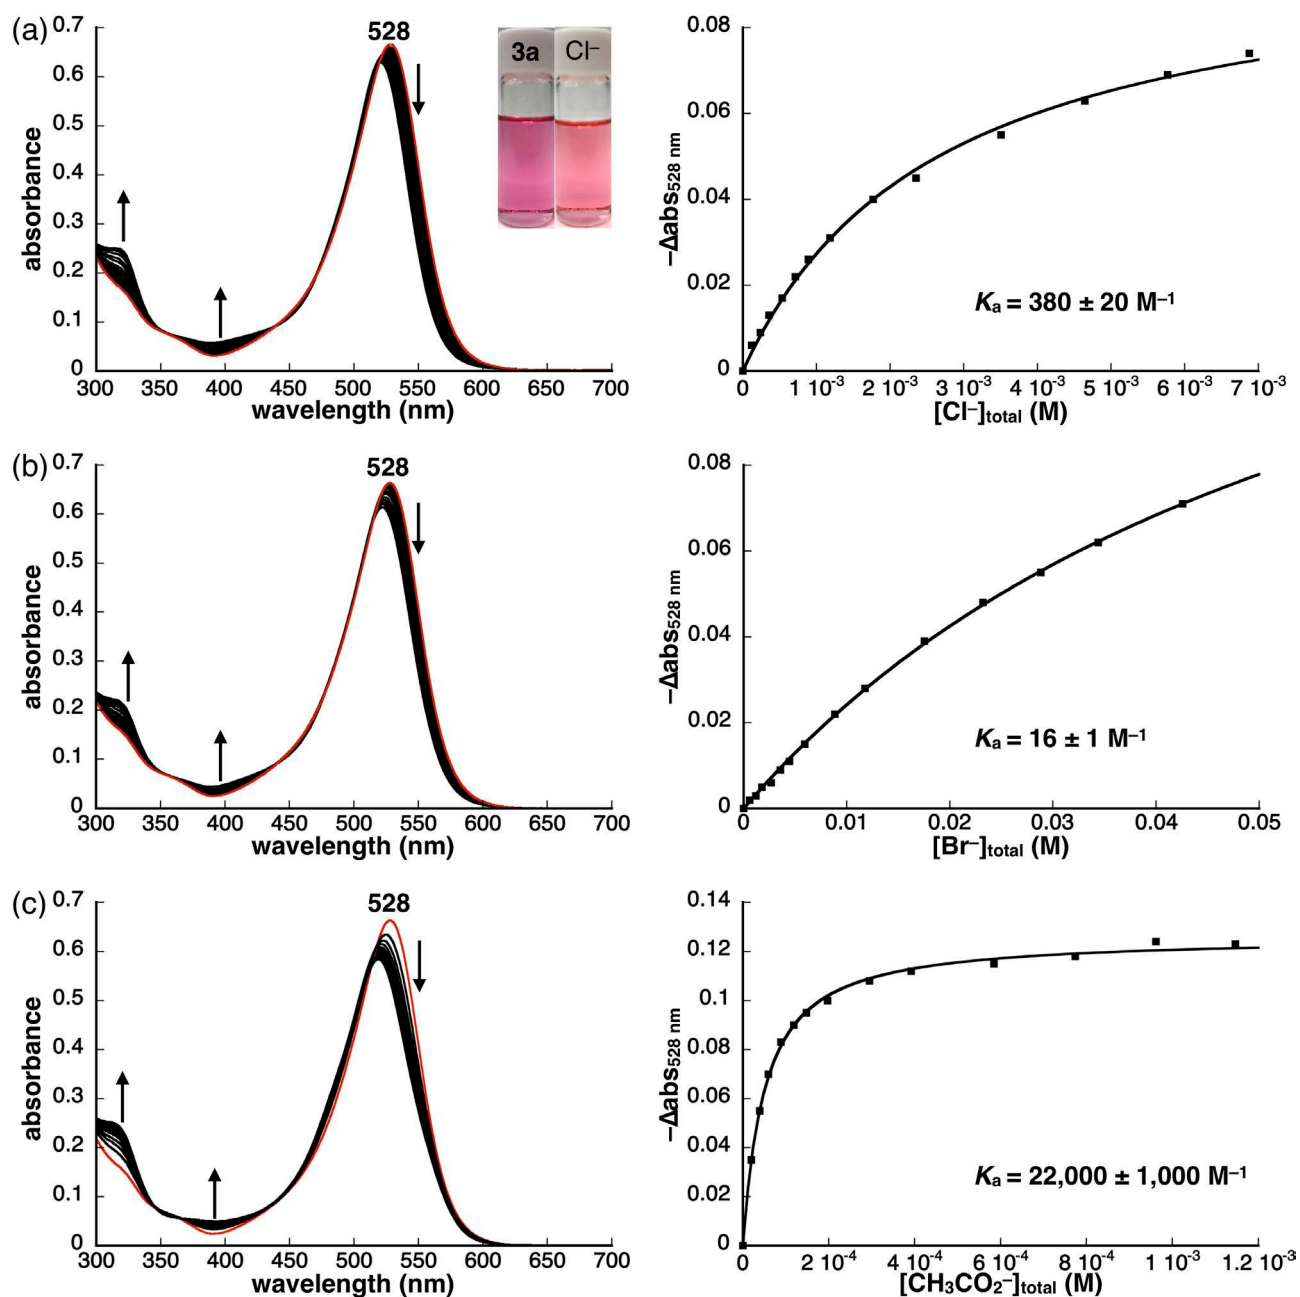

**Fig. S21** UV/vis absorption spectral changes (left) and titration plots and 1:1 fitting curves (right) of **3a** ( $1.0 \times 10^{-5}$  M) upon the addition of (a)  $\text{Cl}^-$ , (b)  $\text{Br}^-$ , and (c)  $\text{CH}_3\text{CO}_2^-$  as TBA salts in  $\text{CH}_2\text{Cl}_2$  (red lines: initial states of **3a**) and photographs under visible light in the absence and presence of  $\text{Cl}^-$  (600 equiv) under the conditions for spectral measurements (inset).

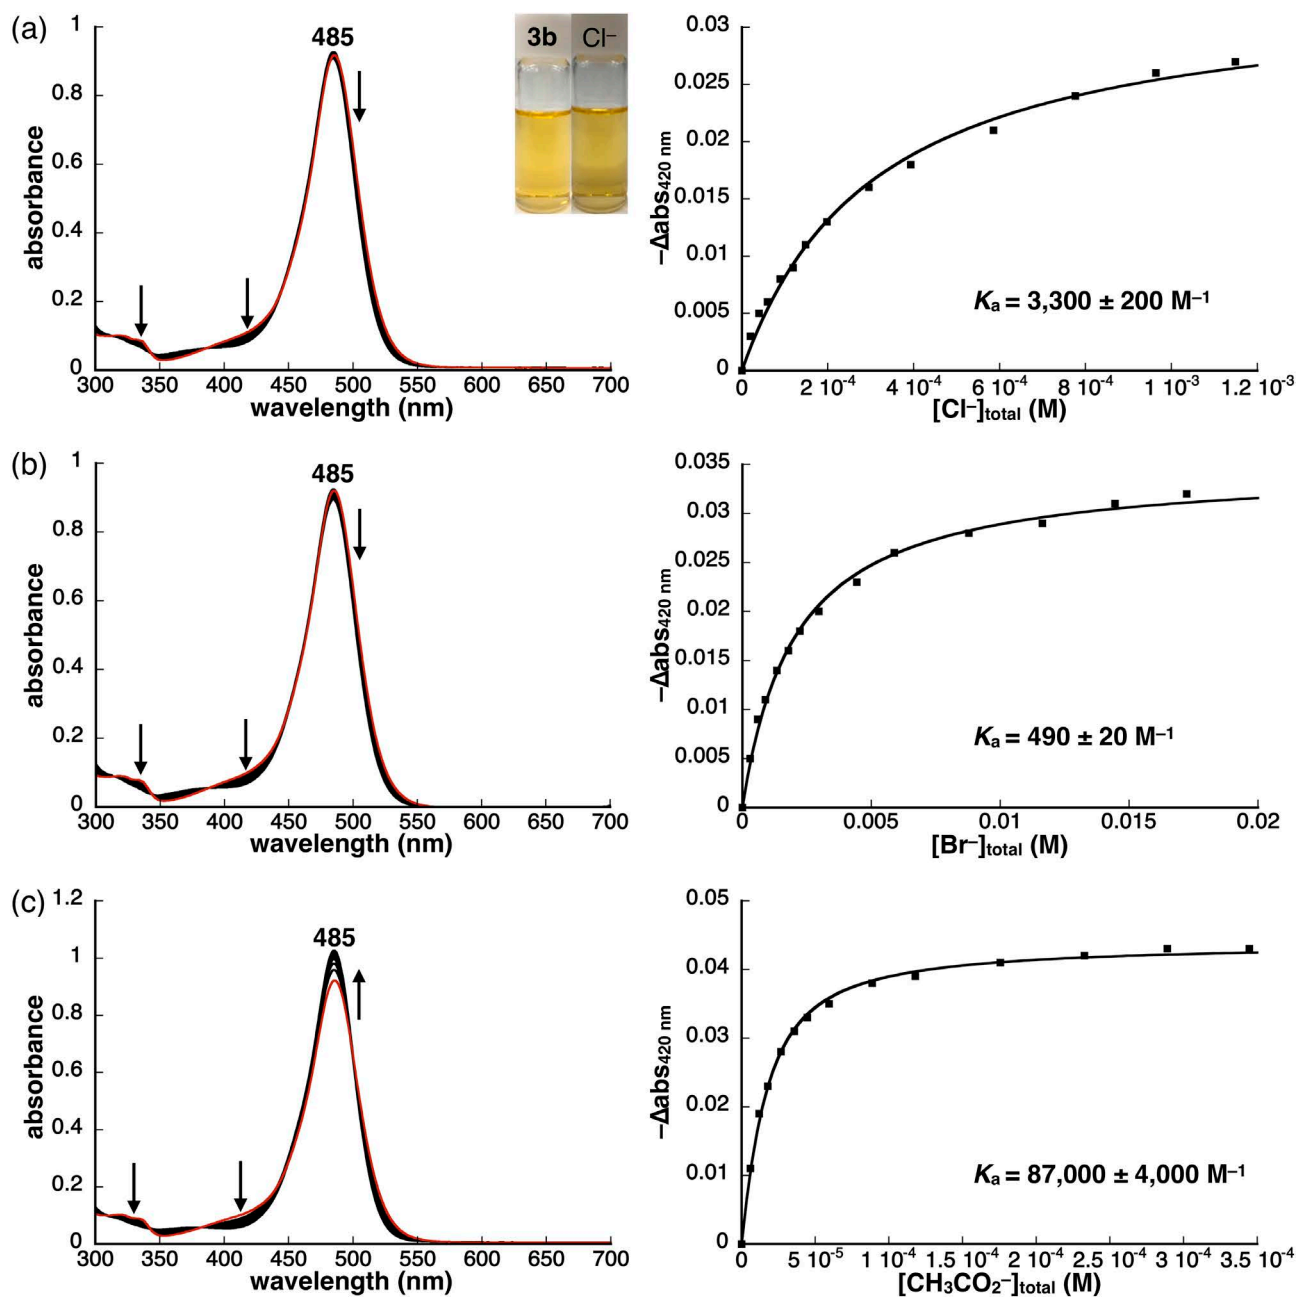

**Fig. S22** UV/vis absorption spectral changes (left) and titration plots and 1:1 fitting curves (right) of **3b** ( $1.0 \times 10^{-5}$  M) upon the addition of (a)  $\text{Cl}^-$ , (b)  $\text{Br}^-$ , and (c)  $\text{CH}_3\text{CO}_2^-$  as TBA salts in  $\text{CH}_2\text{Cl}_2$  (red lines: initial states of **3b**) and photographs under visible light in the absence and presence of  $\text{Cl}^-$  (100 equiv) under the conditions for spectral measurements (inset).

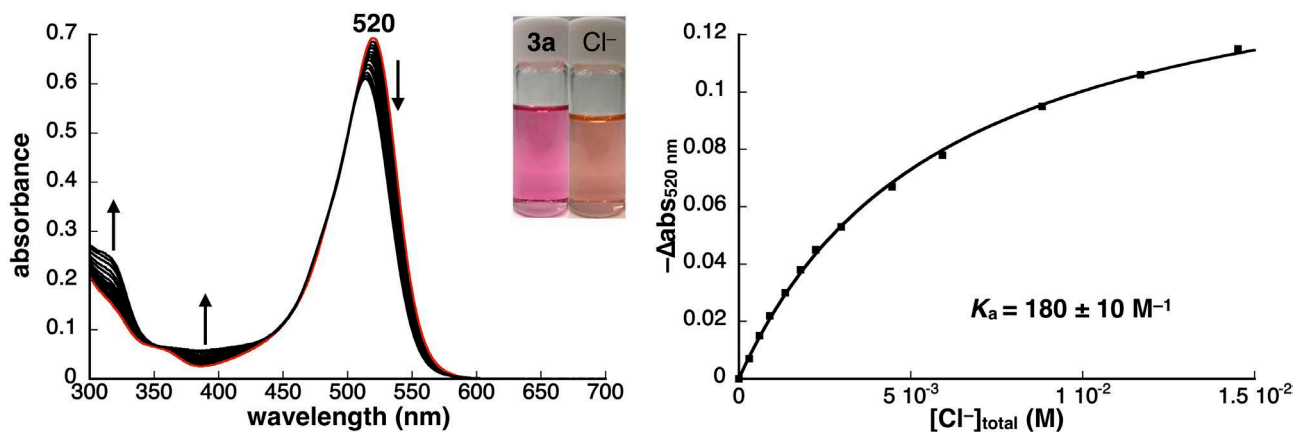

**Fig. S23** UV/vis absorption spectral changes (left) and titration plots and 1:1 fitting curve (right) of **3a** ( $1.0 \times 10^{-5}$  M) upon the addition of  $\text{Cl}^-$  as a TBA salt in THF (red lines: initial state of **3a**) and photographs under visible light in the absence and presence of  $\text{Cl}^-$  (1500 equiv) under the conditions for spectral measurements (inset). From this experiment,  $\text{Cl}^-$ , which is more effectively bound than  $\text{Br}^-$ , was examined as a representative anion for sensing by considering the previous study, in which  $\text{CH}_3\text{CO}_2^-$  induced another PET process and resulting fluorescence quenching.<sup>[S1]</sup>

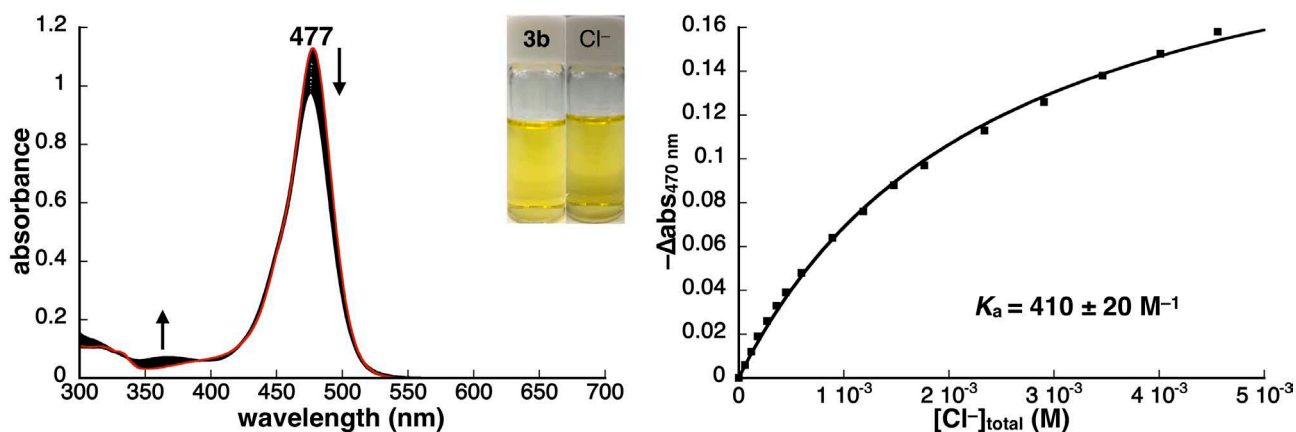

**Fig. S24** UV/vis absorption spectral changes (left) and titration plots and 1:1 fitting curve (right) of **3b** ( $1.0 \times 10^{-5}$  M) upon the addition of  $\text{Cl}^-$  as a TBA salt in THF (red lines: initial state of **3b**) and photographs under visible light in the absence and presence of  $\text{Cl}^-$  (600 equiv) under the conditions for spectral measurements (inset).

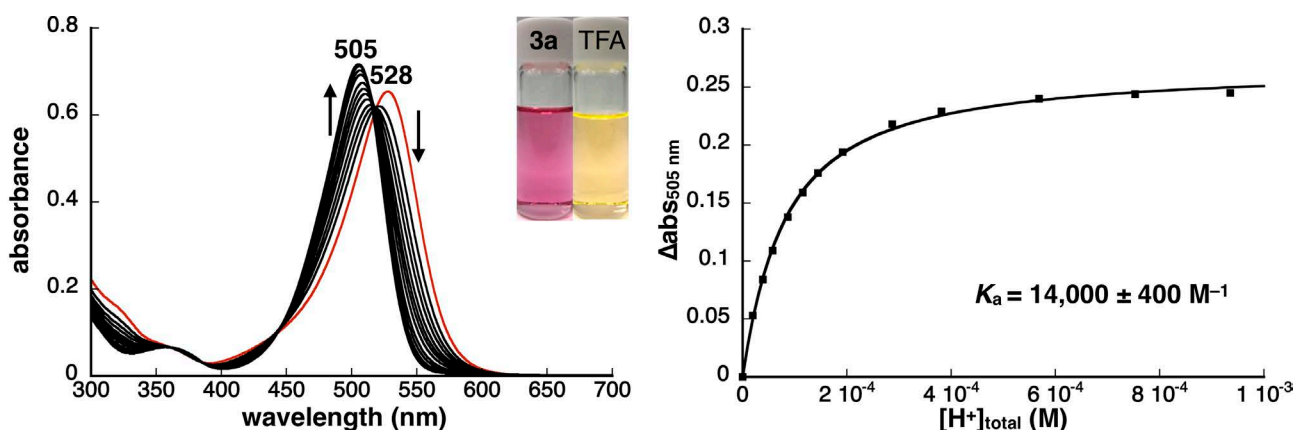

**Fig. S25** UV/vis absorption spectral changes (left) and titration plots and 1:1 fitting curve (right) of **3a** ( $1.0 \times 10^{-5}$  M) upon the addition of trifluoroacetic acid (TFA) in  $\text{CH}_2\text{Cl}_2$  (red lines: initial state of **3a**) and photographs under visible light in the absence and presence of TFA (100 equiv) under the conditions for spectral measurements (inset). The spectral changes by protonation were fitted to the 1:1 binding curve, suggesting that protonated processes at two  $N,N$ -dimethylamino units were not cooperative. Thus, the host concentration was set to the twice of **3a**.



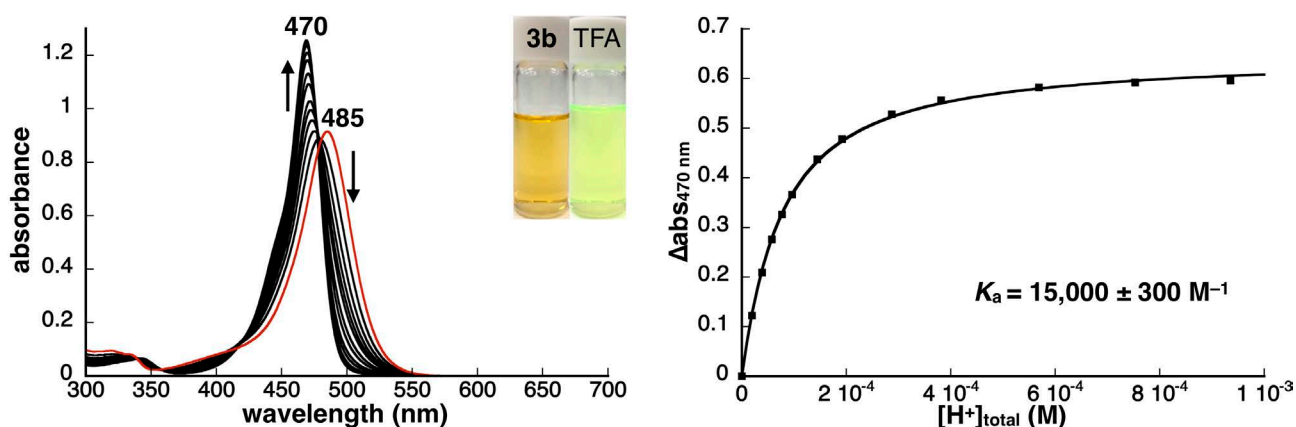

**Fig. S26** UV/vis absorption spectral changes (left) and titration plots and 1:1 fitting curve (right) of **3b** ( $1.0 \times 10^{-5}$  M) upon the addition of TFA in  $\text{CH}_2\text{Cl}_2$  (red lines: initial state of **3b**) and photographs under visible light in the absence and presence of TFA (100 equiv) under the conditions for spectral measurements (inset). The spectral changes by protonation were fitted to the 1:1 binding curve, suggesting that protonated processes at two *N,N*-dimethylamino units were not cooperative. Thus, the host concentration was set to the twice of **3b**.

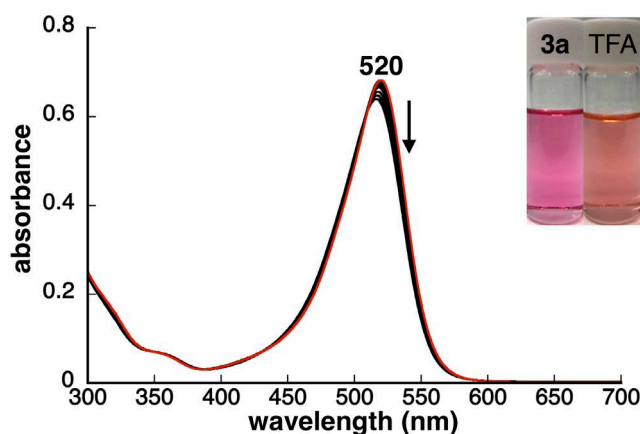

**Fig. S27** UV/vis absorption spectral changes of **3a** ( $1.0 \times 10^{-5}$  M) upon the addition of TFA (0–9000 equiv) in THF (red lines: initial state of **3a**) and photographs under visible light in the absence and presence of TFA (9000 equiv) under the conditions for spectral measurements (inset). The small spectral changes along with a very low fluorescence quantum yield ( $\Phi_{\text{FL}}$ : 0.000) was observed, suggesting that **3a** showed very weak interactions with proton in THF.

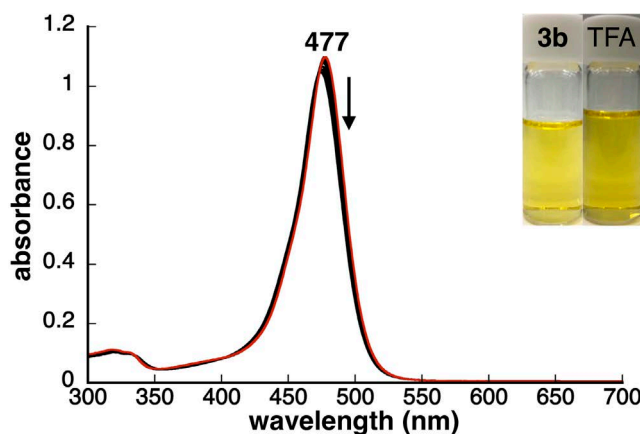

**Fig. S28** UV/vis absorption spectral changes of **3b** ( $1.0 \times 10^{-5}$  M) upon the addition of TFA (0–9000 equiv) in THF (red lines: initial state of **3b**) and photographs under visible light in the absence and presence of TFA (9000 equiv) under the conditions for spectral measurements (inset). The small spectral changes along with a very low fluorescence quantum yield ( $\Phi_{\text{FL}}$ : 0.027) was observed, suggesting that **3b** showed very weak interactions with proton in THF.

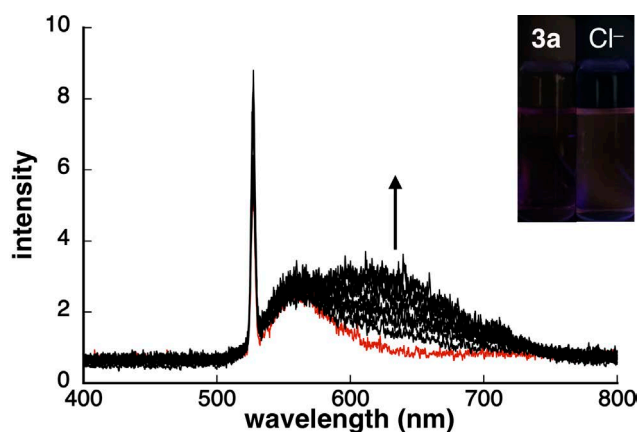

**Fig. S29** (a) Fluorescence spectral changes of **3a** ( $1.0 \times 10^{-5}$  M) upon the addition of  $\text{Cl}^-$  as a TBA salt (0–600 equiv) in  $\text{CH}_2\text{Cl}_2$  (red lines: initial state of **3a**), excited at the absorption maximum of **3a**, and photographs under 365-nm UV light in the absence and presence of  $\text{Cl}^-$  (600 equiv) under the conditions for spectral measurements (inset).  $\Phi_{\text{FL}}$ , obtained by the excitation at the absorption maximum, in **3a**· $\text{Cl}^-$  was 0.002.

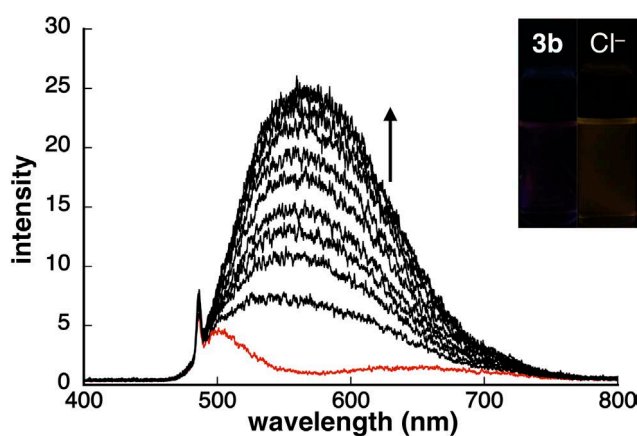

**Fig. S30** (a) Fluorescence spectral changes of **3b** ( $1.0 \times 10^{-5}$  M) upon the addition of  $\text{Cl}^-$  as a TBA salt (0–100 equiv) in  $\text{CH}_2\text{Cl}_2$  (red lines: initial state of **3b**), excited at the absorption maximum of **3b**, and photographs under 365-nm UV light in the absence and presence of  $\text{Cl}^-$  (100 equiv) under the conditions for spectral measurements (inset).  $\Phi_{\text{FL}}$ , obtained by the excitation at the absorption maximum, in **3b**· $\text{Cl}^-$  was 0.069.

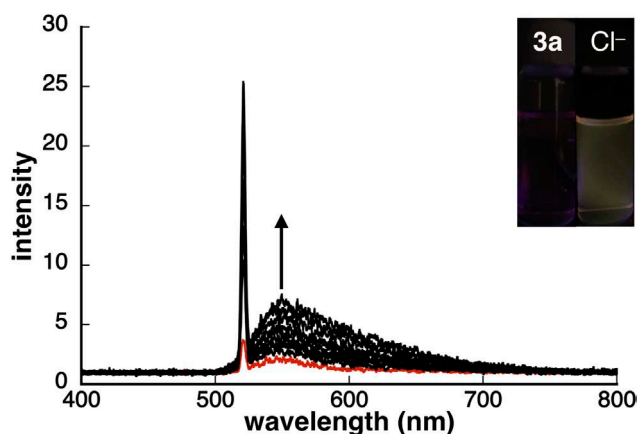

**Fig. S31** (a) Fluorescence spectral changes of **3a** ( $1.0 \times 10^{-5}$  M) upon the addition of  $\text{Cl}^-$  as a TBA salt (0–1500 equiv) in THF (red lines: initial state of **3a**), excited at the absorption maximum of **3a**, and photographs under 365-nm UV light in the absence and presence of  $\text{Cl}^-$  (1500 equiv) under the conditions for spectral measurements (inset).  $\Phi_{\text{FL}}$ , obtained by the excitation at the absorption maximum, in **3a**· $\text{Cl}^-$  was 0.031.

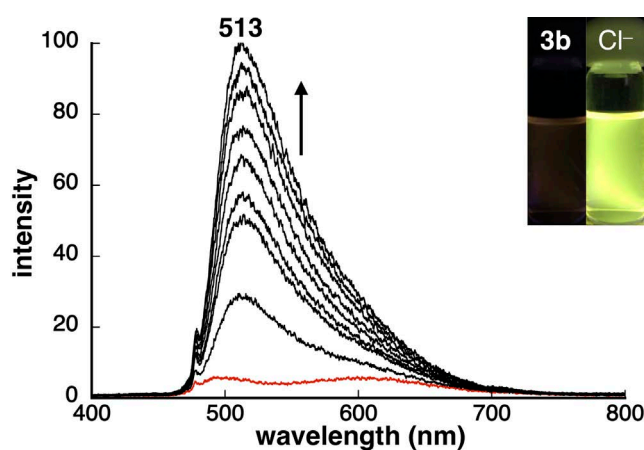

**Fig. S32** (a) Fluorescence spectral changes of **3b** ( $1.0 \times 10^{-5}$  M) upon the addition of  $\text{Cl}^-$  as a TBA salt (0–600 equiv) in THF (red lines: initial state of **3b**), excited at the absorption maximum of **3b**, and photographs under 365-nm UV light in the absence and presence of  $\text{Cl}^-$  (600 equiv) under the conditions for spectral measurements (inset).  $\Phi_{\text{FL}}$ , obtained by the excitation at the absorption maximum, in **3b**· $\text{Cl}^-$  was 0.15.

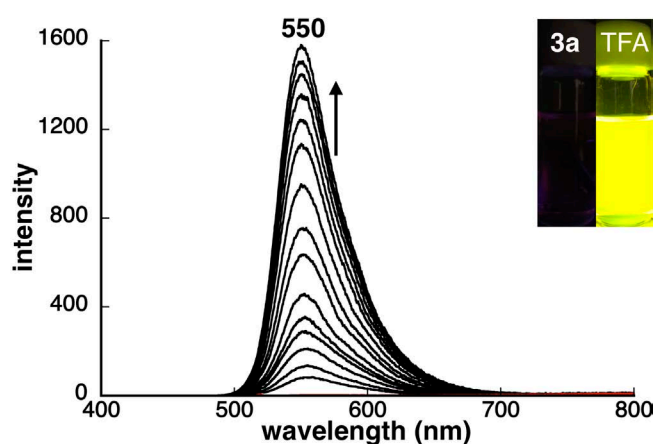

**Fig. S33** (a) Fluorescence spectral changes of **3a** ( $1.0 \times 10^{-5}$  M) upon the addition of TFA (0–100 equiv) in  $\text{CH}_2\text{Cl}_2$  (red lines: initial state of **3a**), excited at the isosbestic point (510 nm) in the UV/vis absorption spectral changes, and photographs under 365-nm UV light in the absence and presence of TFA (100 equiv) under the conditions for spectral measurements (inset).  $\Phi_{\text{FL}}$ , obtained by the excitation at the absorption maximum, in **3a**· $2\text{H}^+$  was 0.82.

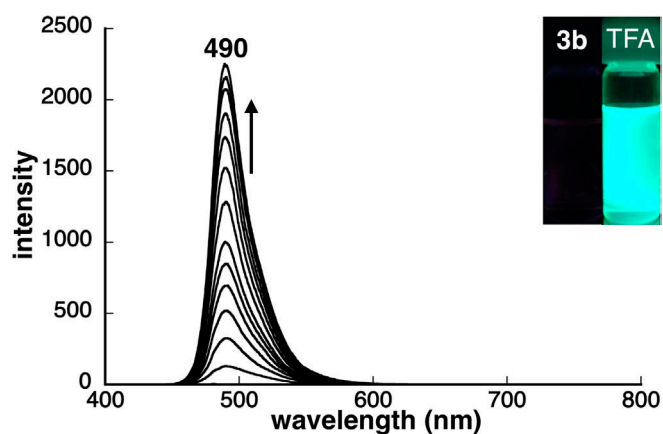

**Fig. S34** (a) Fluorescence spectral changes of **3b** ( $1.0 \times 10^{-5}$  M) upon the addition of TFA (0–100 equiv) in  $\text{CH}_2\text{Cl}_2$  (red lines: initial state of **3b**), excited at the isosbestic point (480 nm) in the UV/vis absorption spectral changes, and photographs under 365-nm UV light in the absence and presence of TFA (100 equiv) under the conditions for spectral measurements (inset).  $\Phi_{\text{FL}}$ , obtained by the excitation at the absorption maximum, in **3b**· $2\text{H}^+$  was 0.76.

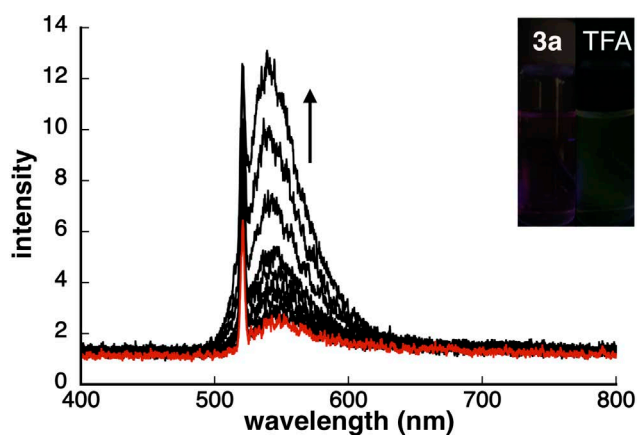

**Fig. S35** (a) Fluorescence spectral changes of **3a** ( $1.0 \times 10^{-5}$  M) upon the addition of TFA (0–9000 equiv) in THF (red lines: initial state of **3a**), excited at the absorption maximum of **3a**, and photographs under 365-nm UV light in the absence and presence of TFA (9000 equiv) under the conditions for spectral measurements (inset).  $\Phi_{\text{FL}}$ , obtained by the excitation at the absorption maximum, in the presence of TFA could not be estimated due to the overlap between excited and emission bands.

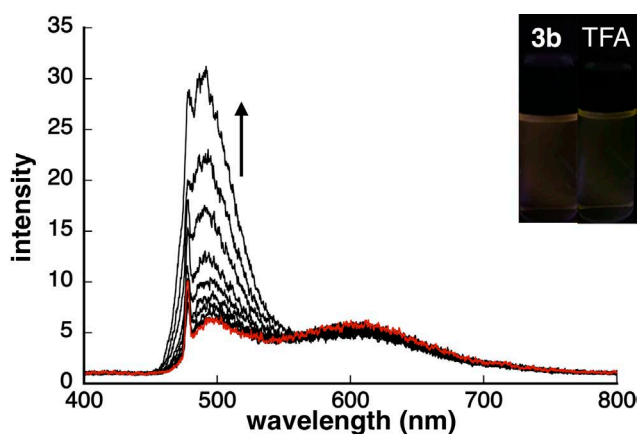

**Fig. S36** (a) Fluorescence spectral changes of **3b** ( $1.0 \times 10^{-5}$  M) upon the addition of TFA (0–9000 equiv) in THF (red lines: initial state of **3b**), excited at the absorption maximum of **3b**, and photographs under 365-nm UV light in the absence and presence of TFA (9000 equiv) under the conditions for spectral measurements (inset).  $\Phi_{\text{FL}}$ , obtained by the excitation at the absorption maximum, in the presence of TFA was 0.027.

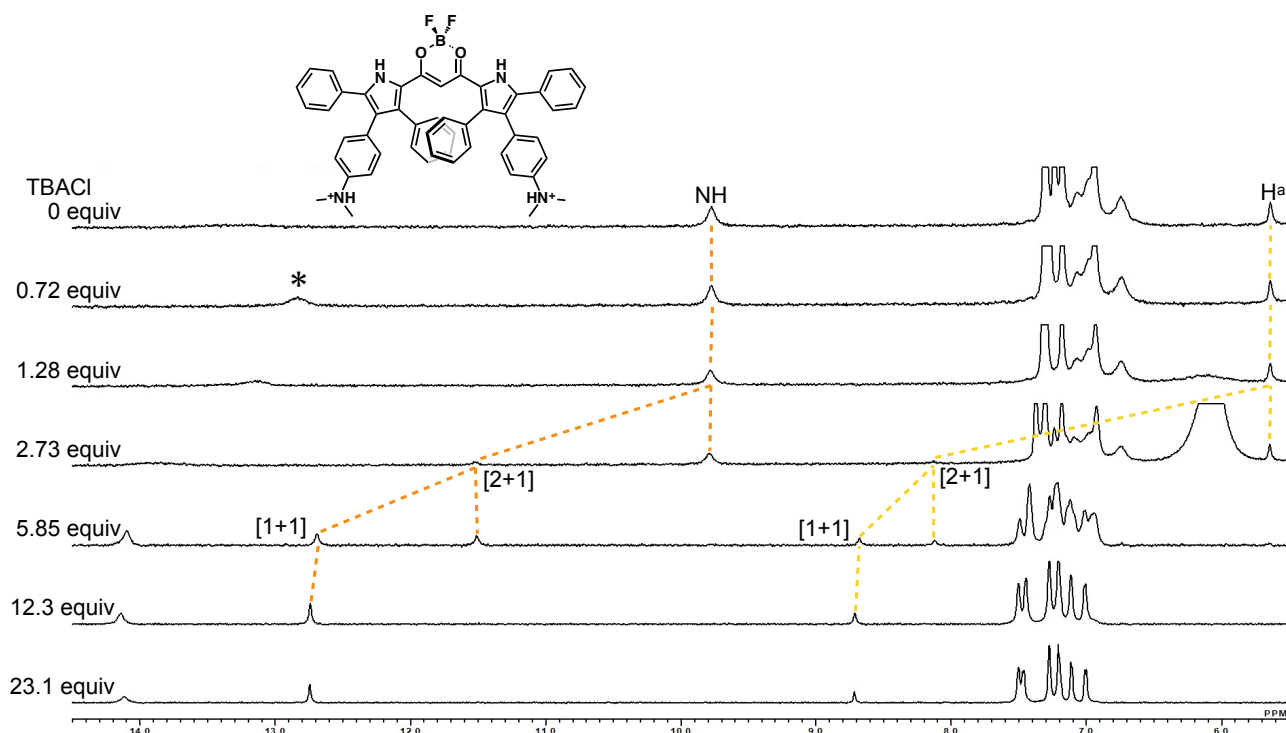

**Fig. S37**  $^1\text{H}$  NMR spectral changes of  $3\mathbf{a}\cdot 2\text{H}^+$  ( $1 \times 10^{-3}$  M) upon the addition of  $\text{Cl}^-$  as a TBA salt (0–23.1 equiv) in  $\text{CD}_2\text{Cl}_2$  in the presence of TFA (5.0 equiv) at  $-50^\circ\text{C}$ . The signals of pyrrole NH and bridging CH ( $\text{H}^{\text{a}}$ ) gradually disappeared and new signals appeared concurrently in the downfield region, suggesting the formation of protonated  $3\mathbf{a}\cdot\text{Cl}^-$  considered as  $3\mathbf{a}\cdot\text{Cl}^- \cdot 2\text{H}^+$ . On the other hand, the examinations for  $3\mathbf{b}\cdot 2\text{H}^+$  could not be conducted because of the less solubility of protonated  $3\mathbf{b}\cdot\text{Cl}^-$ . The signal with asterisk was assigned to *N,N*-dimethylammonium NH by considering the integral and chemical shift. The signal ascribable to *N,N*-dimethylammonium NH (asterisk) were observed upfield due to the shielding effect of  $\text{Cl}^-$  binding (0–0.72 equiv), and the signal shifted downfield probably due to the interaction of *N,N*-dimethylammonium NH with excess  $\text{Cl}^-$  (0.72–23.1 equiv).

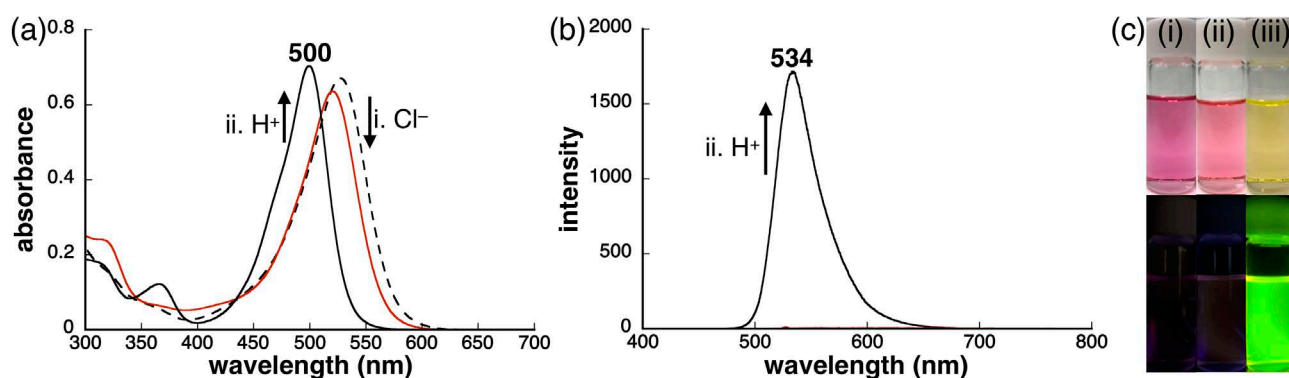

**Fig. S38** (a)(i) UV/vis absorption and (b) fluorescence spectral changes of  $3\mathbf{a}$  ( $1.0 \times 10^{-5}$  M) upon the addition of TFA (100 equiv) in  $\text{CH}_2\text{Cl}_2$  in the presence of  $\text{Cl}^-$  as a TBA salt (600 equiv), wherein broken and red lines showed  $3\mathbf{a}$  and  $3\mathbf{a}\cdot\text{Cl}^-$ , respectively (UV/vis absorption spectral changes of  $3\mathbf{a}$  upon the addition of  $\text{Cl}^-$  in  $\text{CH}_2\text{Cl}_2$ : Fig. S21), and (c) photographs of (i)  $3\mathbf{a}$ , (ii)  $3\mathbf{a}\cdot\text{Cl}^-$ , and (iii) protonated  $3\mathbf{a}\cdot\text{Cl}^-$  under visible light (top) and 365-nm UV light (bottom) under the conditions for spectral measurements.  $\Phi_{\text{FL}}$ , obtained by the excitation at the absorption maximum, was 0.57 (protonated  $3\mathbf{a}\cdot\text{Cl}^-$ ).

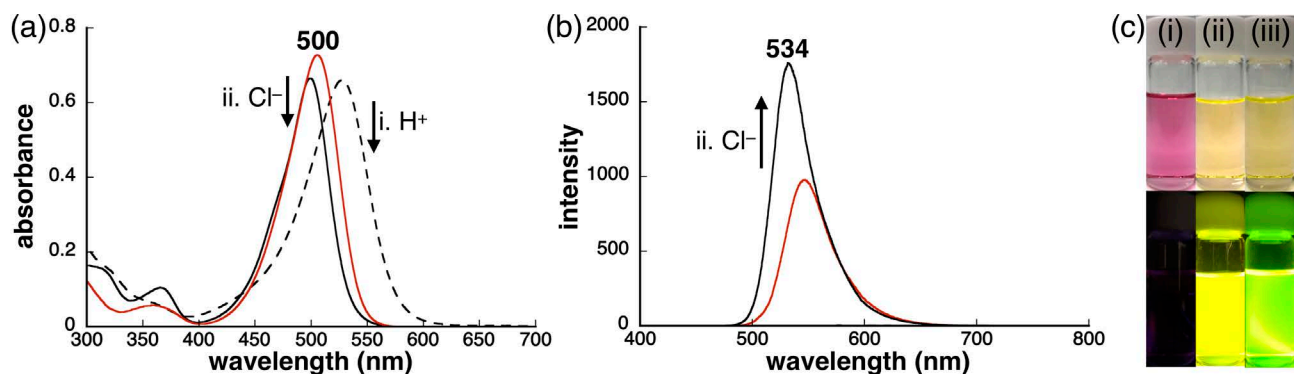

**Fig. S39** (a) UV/vis absorption and (b) fluorescence spectral changes of **3a** ( $1.0 \times 10^{-5}$  M) upon the addition of  $\text{Cl}^-$  as a TBA salt (600 equiv) in  $\text{CH}_2\text{Cl}_2$  in the presence of TFA (100 equiv), wherein broken and red lines showed **3a** and **3a** $\cdot 2\text{H}^+$ , respectively (UV/vis absorption spectral changes of **3a** upon the addition of TFA in  $\text{CH}_2\text{Cl}_2$ : Fig. S25), and (c) photographs of (i) **3a**, (ii) **3a** $\cdot 2\text{H}^+$ , and (iii) protonated **3a** $\cdot \text{Cl}^-$  under visible light (top) and 365-nm UV light (bottom) under the conditions for spectral measurements.

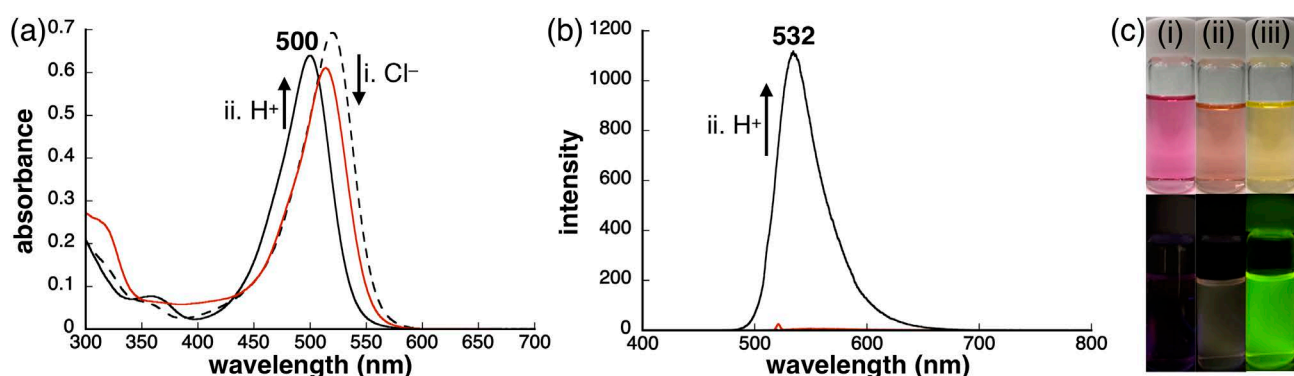

**Fig. S40** (a)(i) UV/vis absorption and (b) fluorescence spectral changes of **3a** ( $1.0 \times 10^{-5}$  M) upon the addition of TFA (9000 equiv) in THF in the presence of  $\text{Cl}^-$  as a TBA salt (1500 equiv), wherein broken and red lines **3a** and **3a** $\cdot \text{Cl}^-$ , respectively (UV/vis absorption spectral changes of **3a** upon the addition of  $\text{Cl}^-$  in THF: Fig. S23), and (c) photographs of (i) **3a**, (ii) **3a** $\cdot \text{Cl}^-$ , and (iii) protonated **3a** $\cdot \text{Cl}^-$  under visible light (top) and 365-nm UV light (bottom) under the conditions for spectral measurements.  $\Phi_{\text{FL}}$ , obtained by the excitation at the absorption maximum, was 0.44 (protonated **3a** $\cdot \text{Cl}^-$ ).

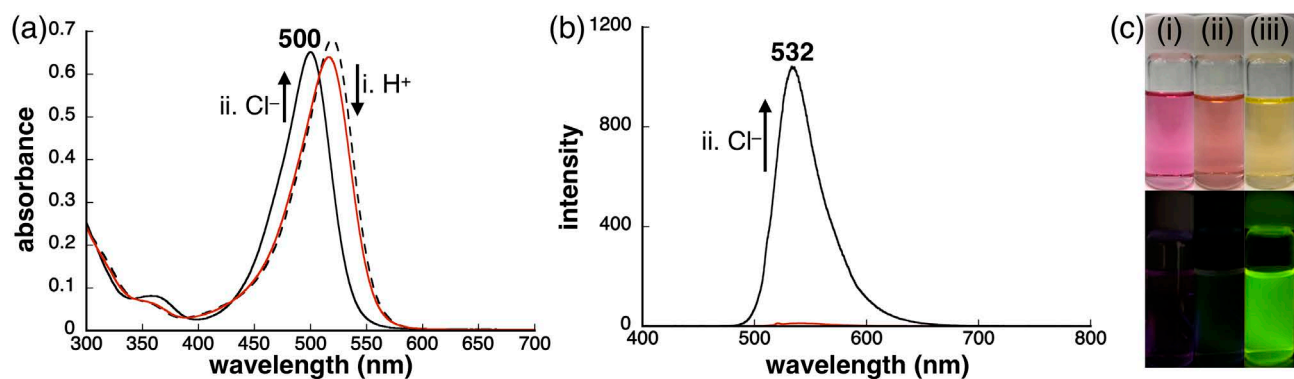

**Fig. S41** (a) (i) UV/vis absorption and (b) fluorescence spectral changes of **3a** ( $1.0 \times 10^{-5}$  M) upon the addition of  $\text{Cl}^-$  as a TBA salt (1500 equiv) in THF in the presence of TFA (9000 equiv), wherein broken and red lines showed **3a** in the absence and presence of TFA, respectively (UV/vis absorption spectral changes of **3a** upon the addition of TFA in THF: Fig. S27), and (c) photographs of (i) **3a**, (ii) **3a** in the presence of TFA, and (iii) protonated **3a** $\cdot \text{Cl}^-$  under visible light (top) and 365-nm UV light (bottom) under the conditions for spectral measurements.

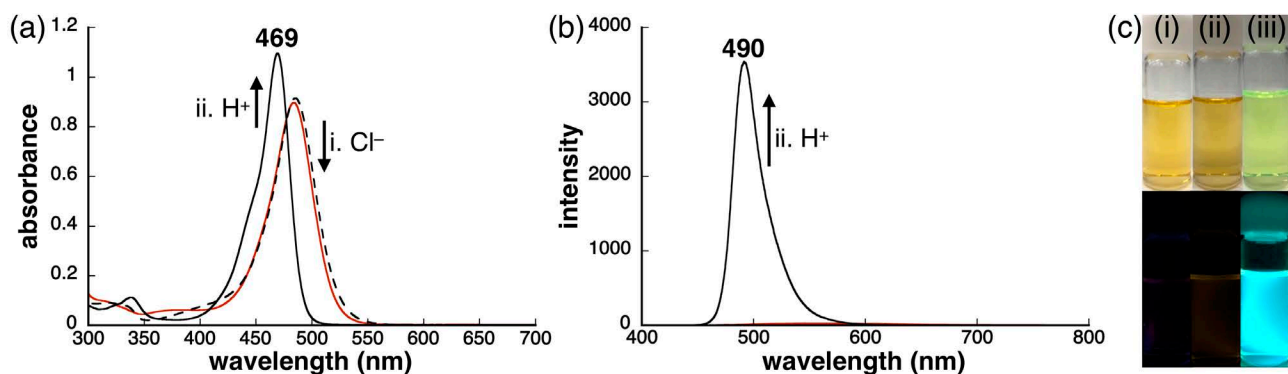

**Fig. S42** (a)(i) UV/vis absorption and (b) fluorescence spectral changes of **3b** ( $1.0 \times 10^{-5}$  M) upon the addition of TFA (100 equiv) in  $\text{CH}_2\text{Cl}_2$  in the presence of  $\text{Cl}^-$  as a TBA salt (300 equiv), wherein broken and red lines showed **3b** and **3b**· $\text{Cl}^-$ , respectively (UV/vis absorption spectral changes of **3b** upon the addition of  $\text{Cl}^-$  in  $\text{CH}_2\text{Cl}_2$ : Fig. S22), and (c) photographs of (i) **3b**, (ii) **3b**· $\text{Cl}^-$ , and (iii) protonated **3b**· $\text{Cl}^-$  under visible light (top) and 365-nm UV light (bottom) under the conditions for spectral measurements.  $\Phi_{\text{FL}}$ , obtained by the excitation at the absorption maximum, was 0.62 (protonated **3b**· $\text{Cl}^-$ ).

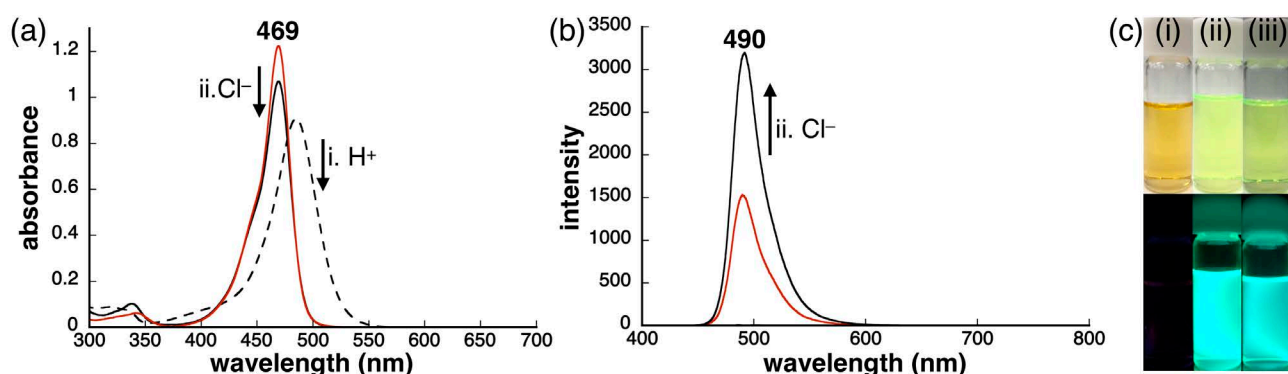

**Fig. S43** (a)(i) UV/vis absorption and (b) fluorescence spectral changes of **3b** ( $1.0 \times 10^{-5}$  M) upon the addition of  $\text{Cl}^-$  as a TBA salt (300 equiv) in  $\text{CH}_2\text{Cl}_2$  in the presence of TFA (100 equiv), wherein broken and red lines showed **3b** and **3b**· $2\text{H}^+$ , respectively (UV/vis absorption spectral changes of **3b** upon the addition of TFA in  $\text{CH}_2\text{Cl}_2$ : Fig. S26), and (c) photographs of (i) **3b**, (ii) **3b**· $2\text{H}^+$ , and (iii) protonated **3b**· $\text{Cl}^-$  under visible light (top) and 365-nm UV light (bottom) under the conditions for spectral measurements.

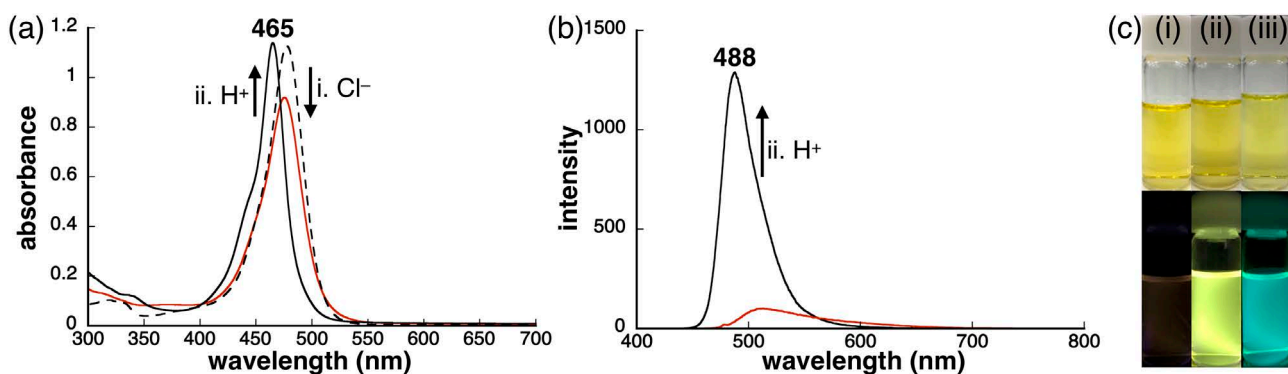

**Fig. S44** (a)(i) UV/vis absorption and (b) fluorescence spectral changes of **3b** ( $1.0 \times 10^{-5}$  M) upon the addition of TFA (9000 equiv) in THF in the presence of  $\text{Cl}^-$  as a TBA salt (600 equiv), wherein broken and lines showed **3b** and **3b**· $\text{Cl}^-$ , respectively (UV/vis absorption spectral changes of **3b** upon the addition of  $\text{Cl}^-$  in THF: Fig. S24), and (c) photographs of (i) **3b**, (ii) **3b**· $\text{Cl}^-$ , and (iii) protonated **3b**· $\text{Cl}^-$  under visible light (top) and 365-nm UV light (bottom) under the conditions for spectral measurements.  $\Phi_{\text{FL}}$ , obtained by the excitation at the absorption maximum, was 0.44 (protonated **3b**· $\text{Cl}^-$ ).

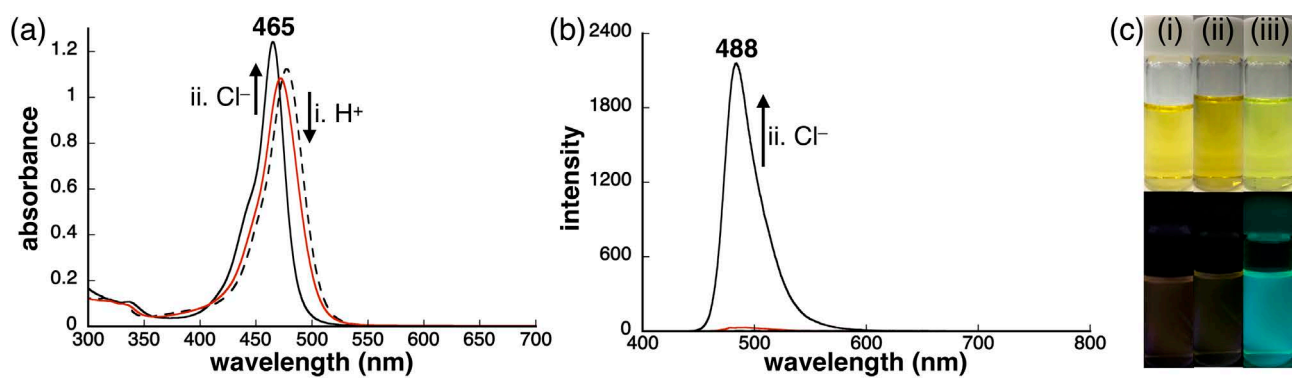

**Fig. S45** (a)(i) UV/vis absorption and (b) fluorescence spectral changes of **3b** ( $1.0 \times 10^{-5}$  M) upon the addition of  $\text{Cl}^-$  as a TBA salt (600 equiv) in THF in the presence of TFA (9000 equiv), wherein broken and red lines showed **3b** in the absence and presence of TFA, respectively (UV/vis absorption spectral changes of **3b** upon the addition of TFA in THF: Fig. S28), and (b) photographs of (i) **3b**, (ii) **3b** in the presence of TFA, and (iii) protonated **3b**· $\text{Cl}^-$  under visible light (top) and 365-nm UV light (bottom) under the conditions for spectral measurements.

[S1] S. Sugiura, Y. Kobayashi, N. Yasuda and H. Maeda, *Chem. Commun.*, 2019, **55**, 8242–8245.
